# Supplementary material
Source: Research Square preprint supplement (doi:10.21203/rs.3.rs-9425840/v1)
Supplement: Supplementary file 1 [file 5c6f55aff48b518b54b4aee1.docx]

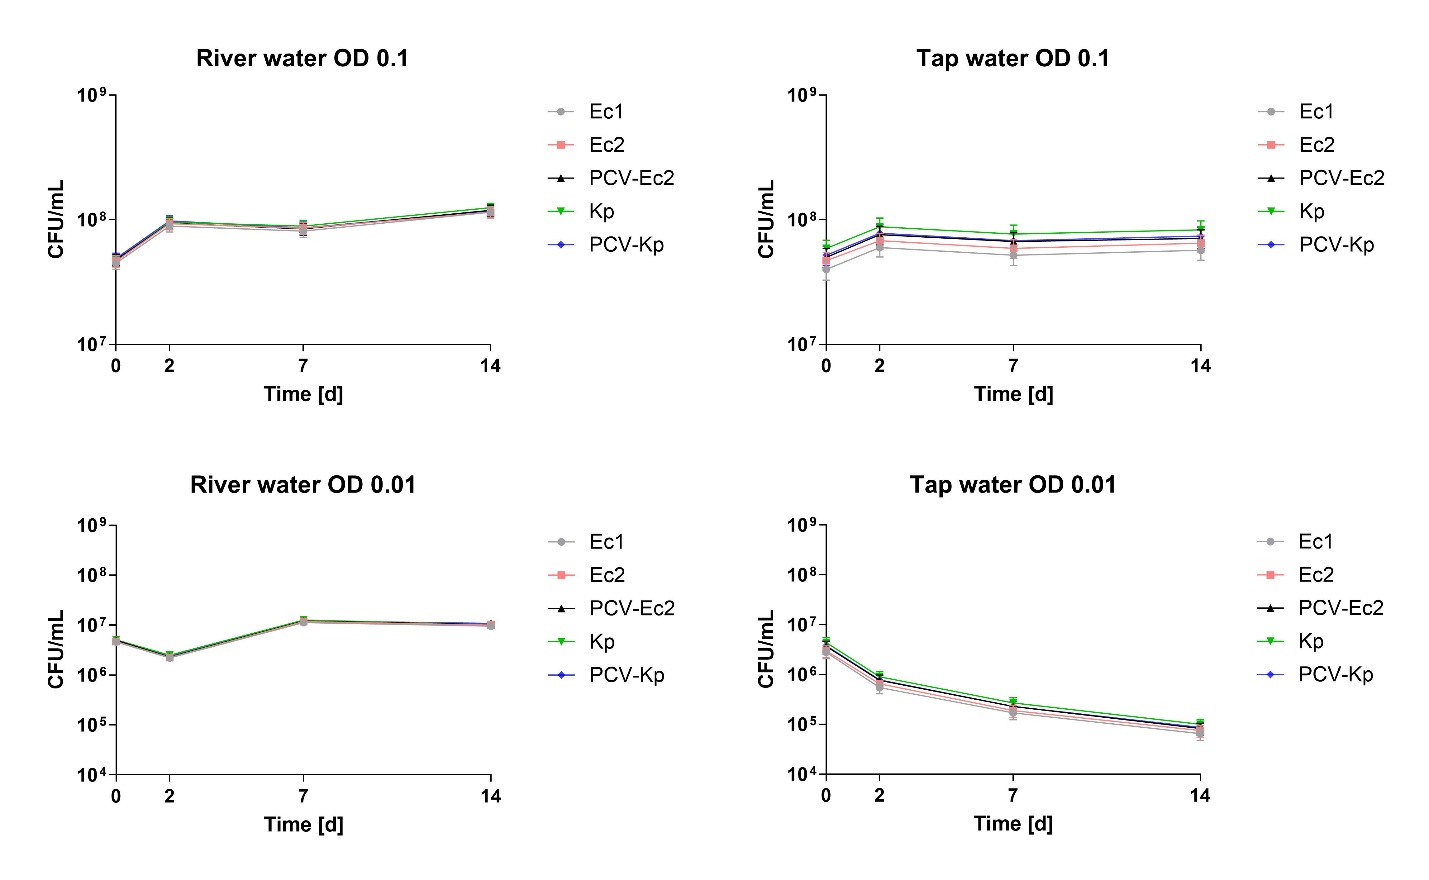


Supplementary Figure S1:Survival of Escherichia coli (Ec1, Ec2) and Klebsiella pneumoniae (Kp), along with their plasmid-cured variants (PCV-Ec2, PCV-Kp), in river water and tap water adjusted to OD 0.1 (approximately 4.84 × 107 cells/mL-1) and OD 0.01 (approximately 4.21 × 106 cells/mL-1). The results represent mean values and standard errors across replicates (n = 3) and are displayed as time course diagrams illustrating overall survival trends. Lines between data points are shown to aid visual orientation.


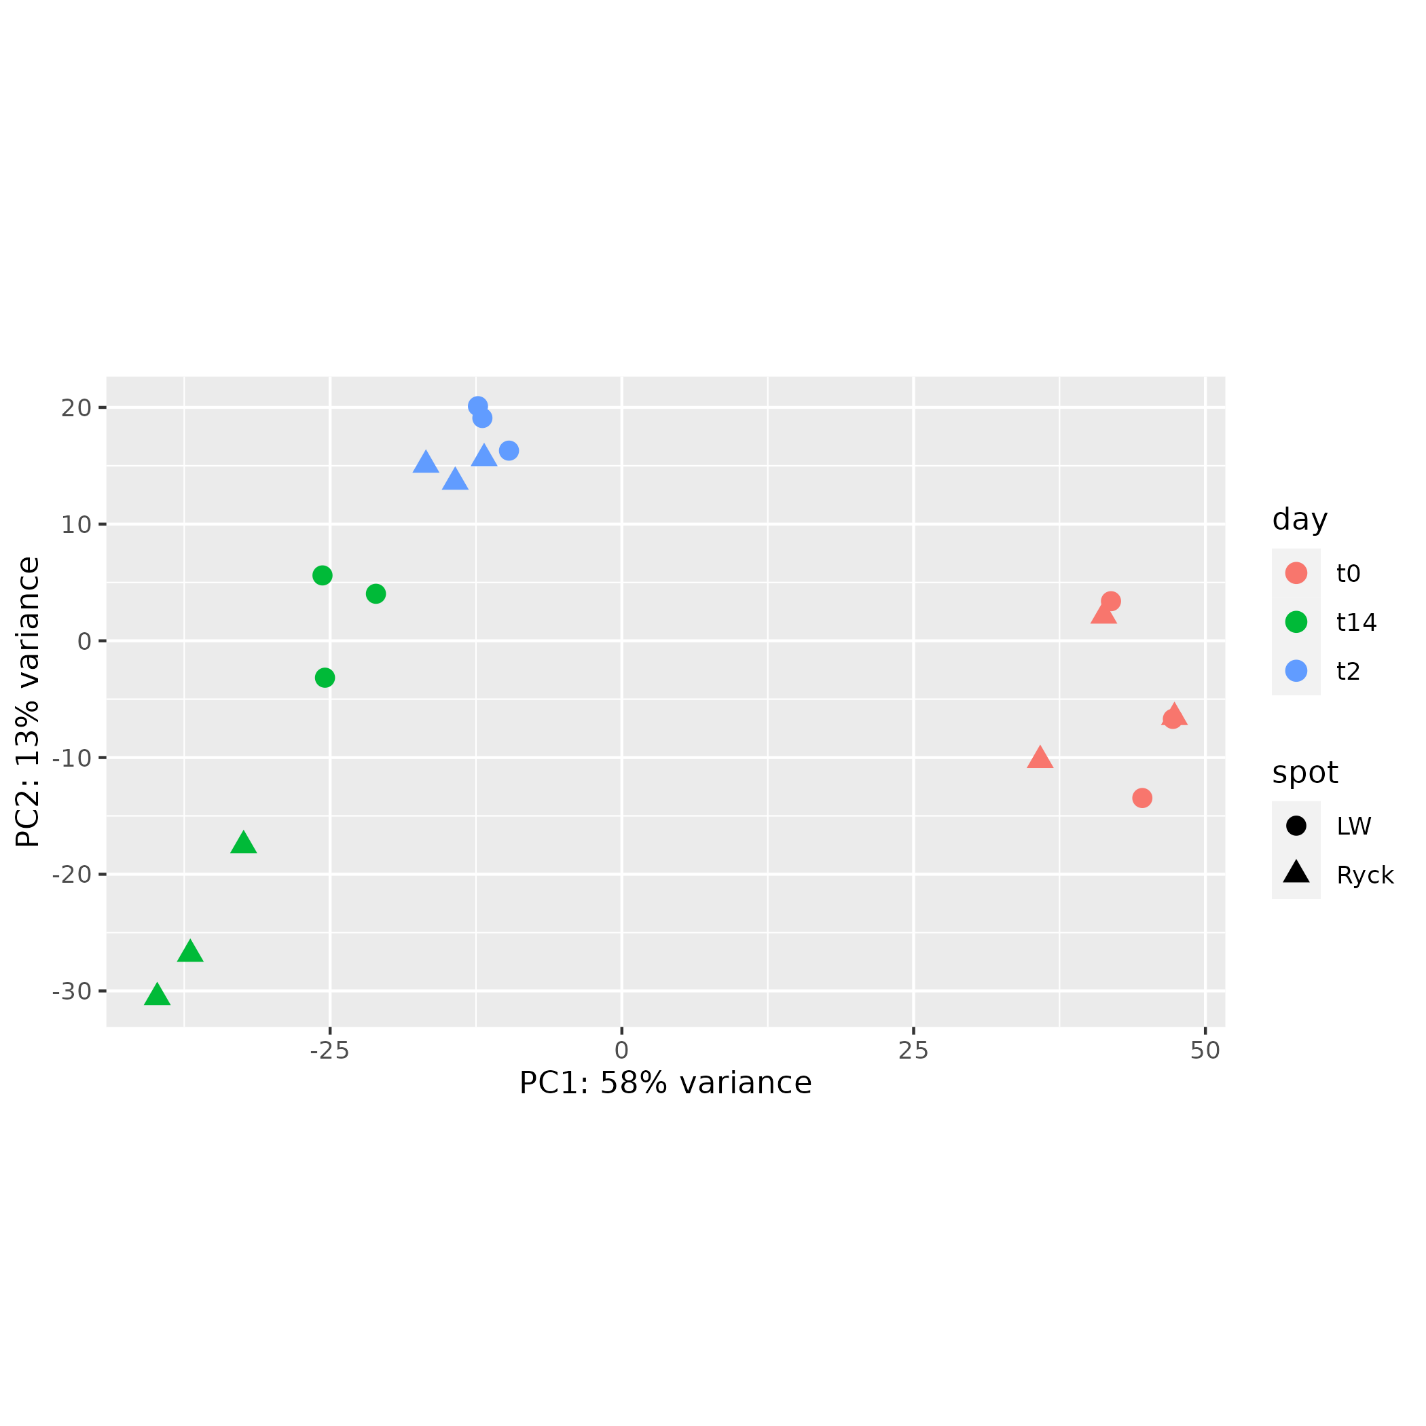


Supplementary Figure S2: Principal component analysis (PCA) of the transcriptomic sequencing output in the wild‑type *Escherichia coli* (Ec1) after incubation in river water (RW) and tap water (TW). The investigated time points included the inoculation (t0), as well as subsequent 2-day and 14-day periods of incubation.


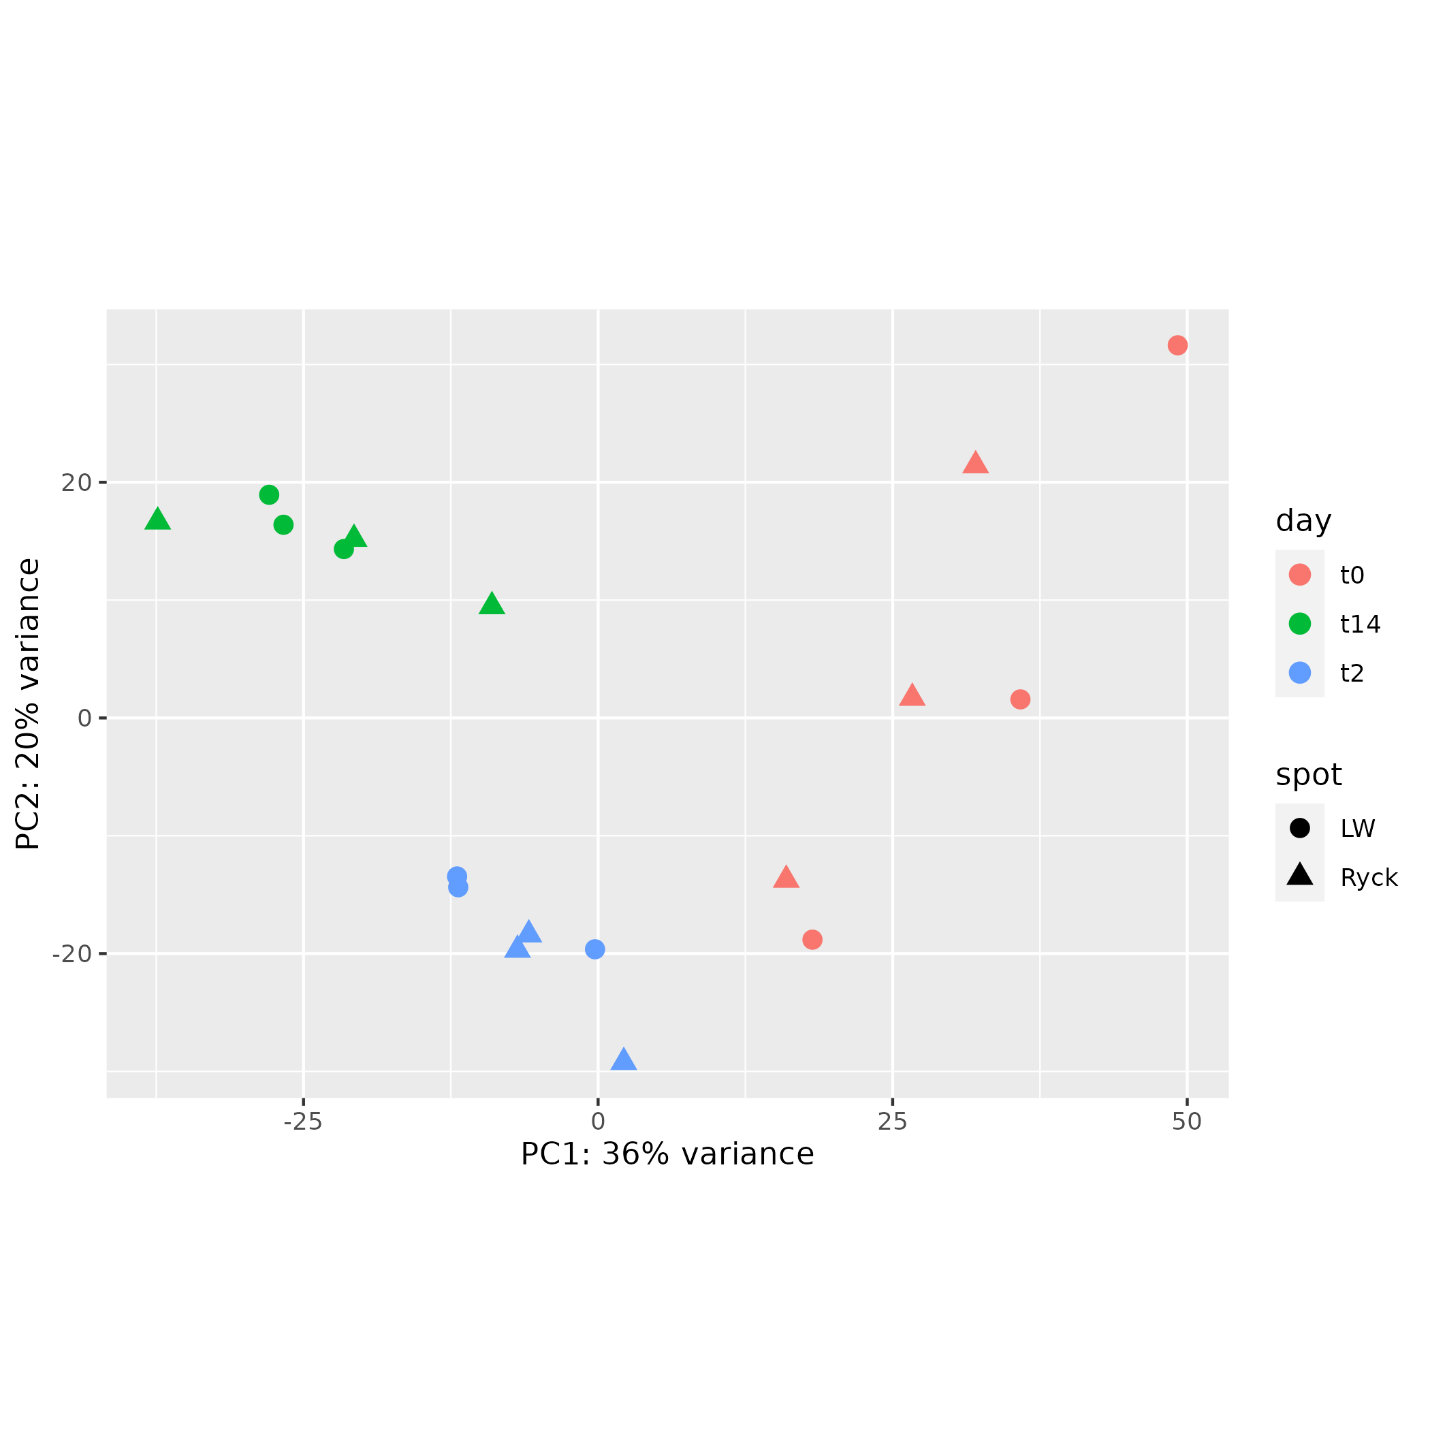


Supplementary Figure S3: Principal component analysis (PCA) of the transcriptomic sequencing output in the wild‑type *Escherichia coli* (Ec2) after incubation in river water (RW) and tap water (TW). The investigated time points included the inoculation (t0), as well as subsequent 2-day and 14-day periods of incubation.


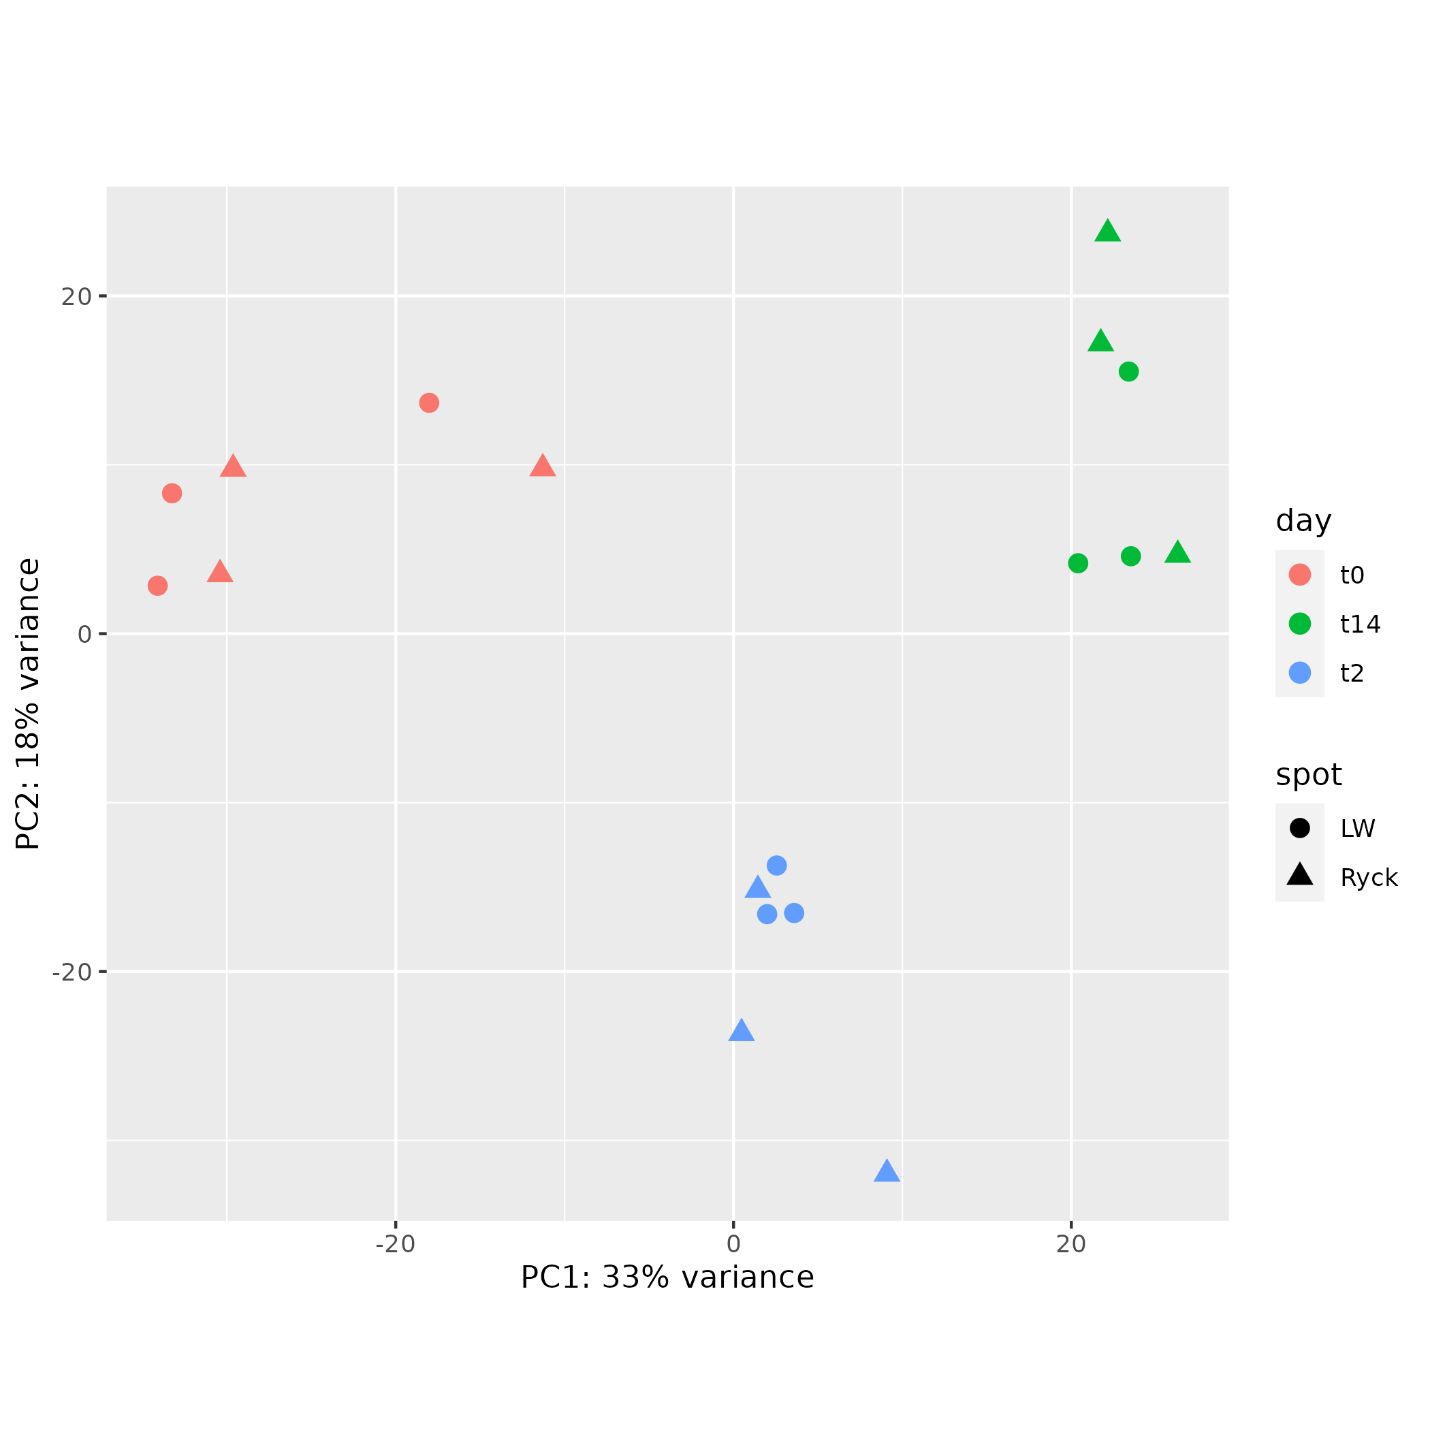


Supplementary Figure S4: Principal component analysis (PCA) of the transcriptomic sequencing output in the plasmid‑cured *Escherichia coli* (PCV-Ec2) after incubation in river water (RW) and tap water (TW). The investigated time points included the inoculation (t0), as well as subsequent 2-day and 14-day periods of incubation.


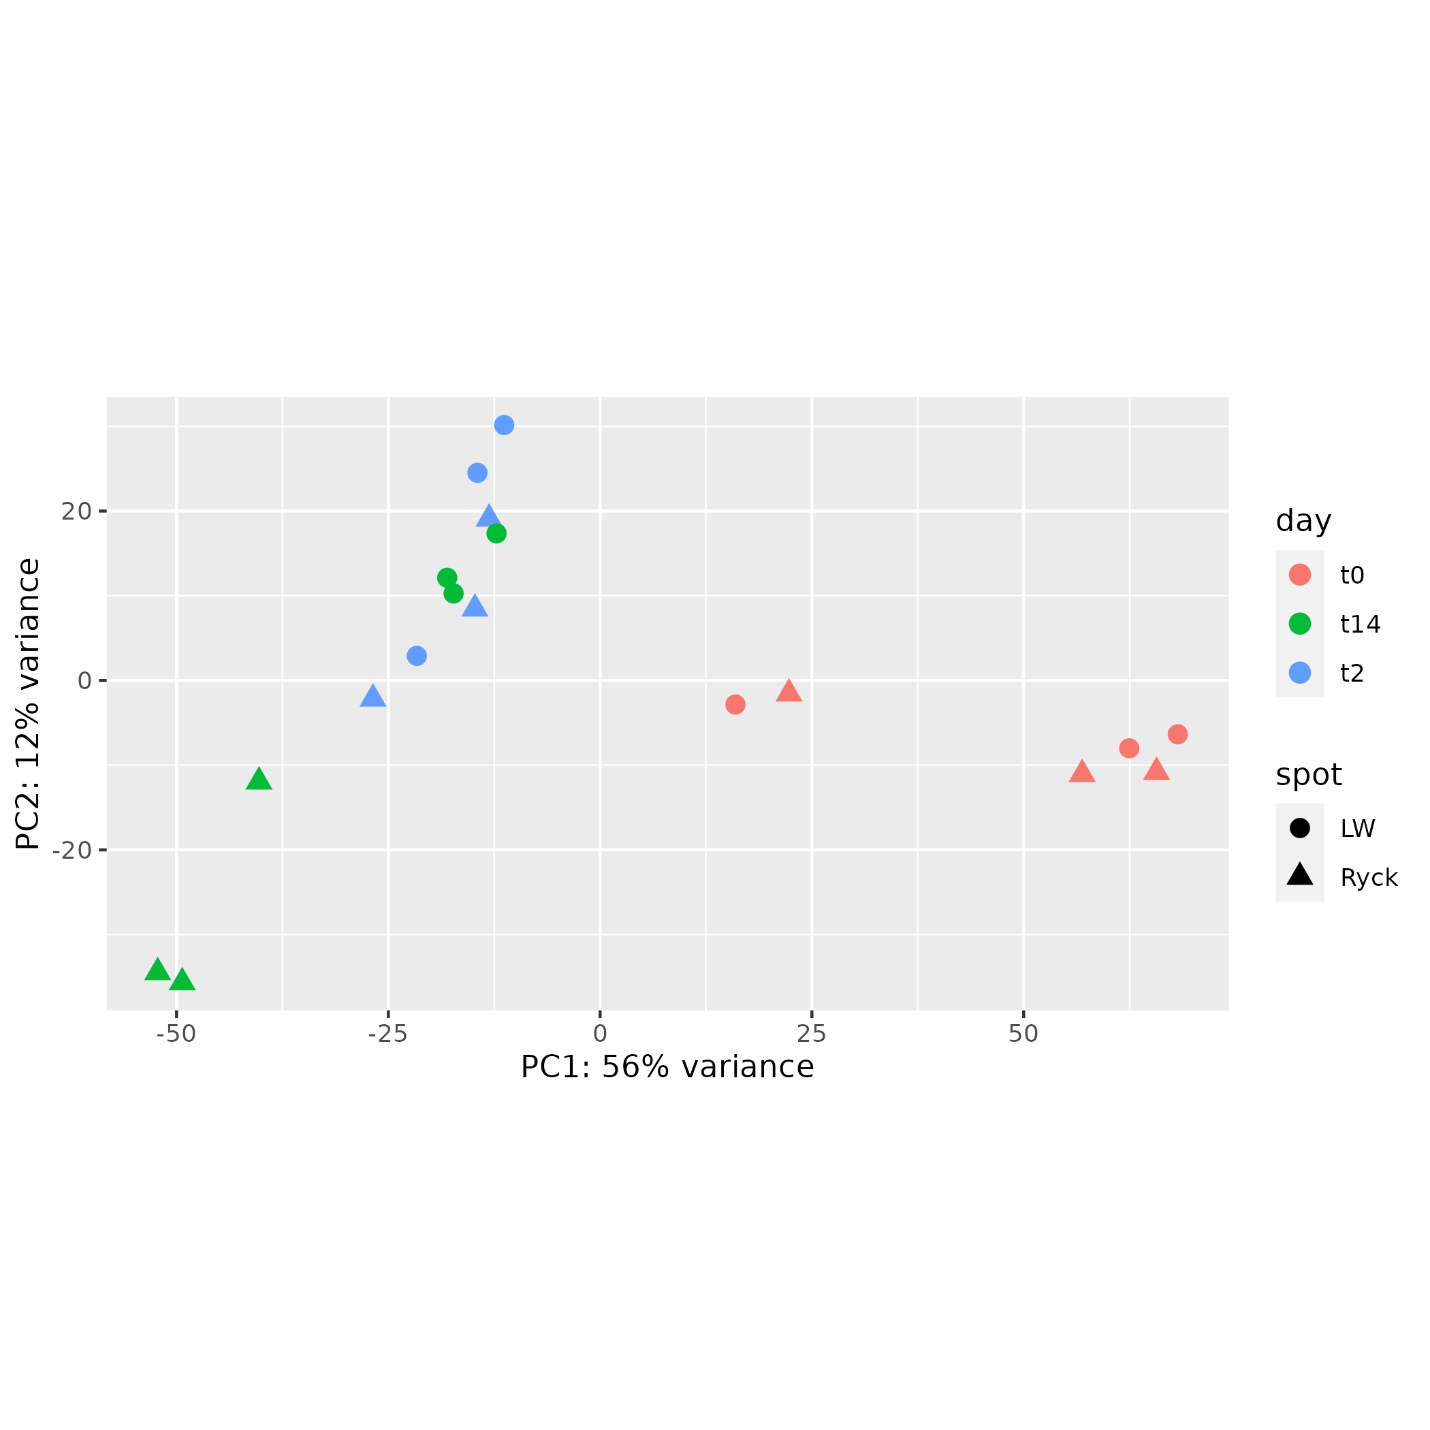


Supplementary Figure S5: Principal component analysis (PCA) of the transcriptomic sequencing output in the wild‑type *Klebsiella pneumoniae* (Kp) after incubation in river water (RW) and tap water (TW). The investigated time points included the inoculation (t0), as well as subsequent 2-day and 14-day periods of incubation.


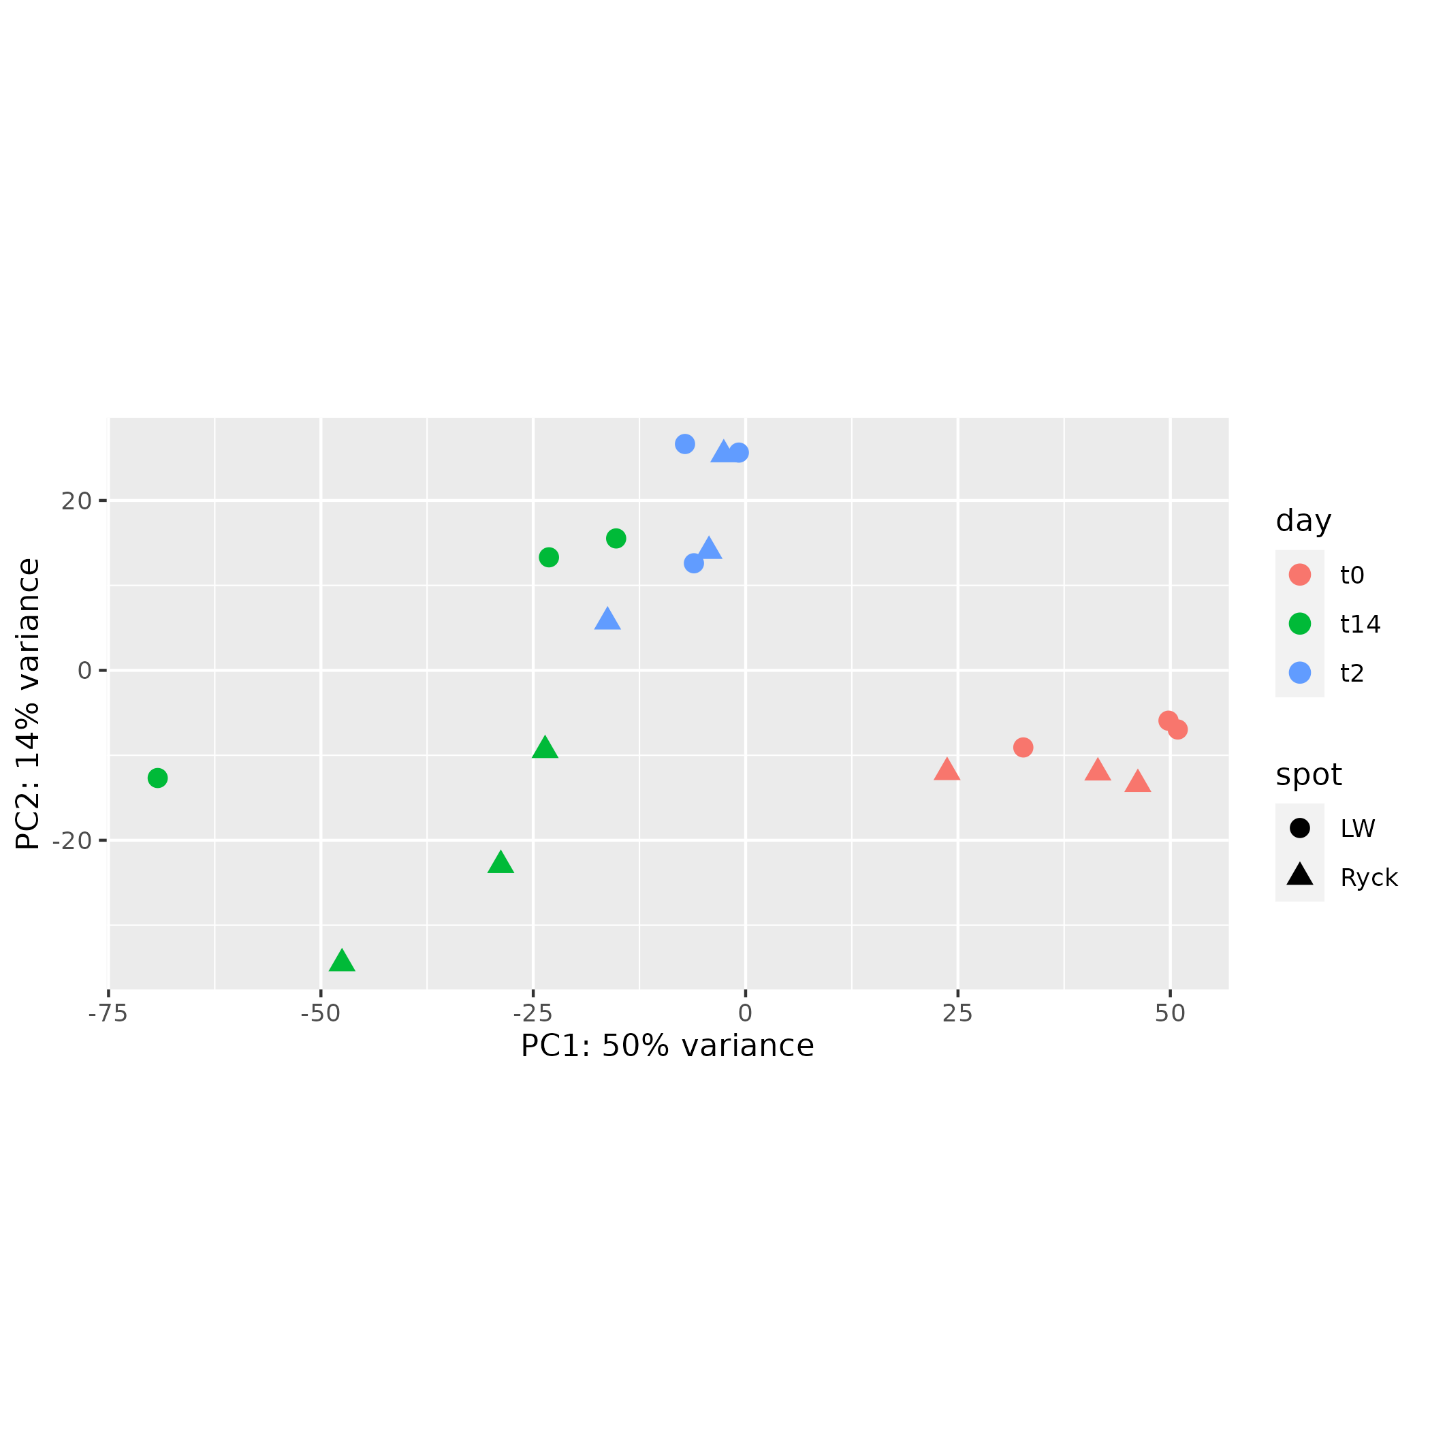


Supplementary Figure S6: Principal component analysis (PCA) of the transcriptomic sequencing output in the plasmid‑cured *Klebsiella pneumoniae* (PCV-Kp) after incubation in river water (RW) and tap water (TW). The investigated time points included the inoculation (t0), as well as subsequent 2-day and 14-day periods of incubation.


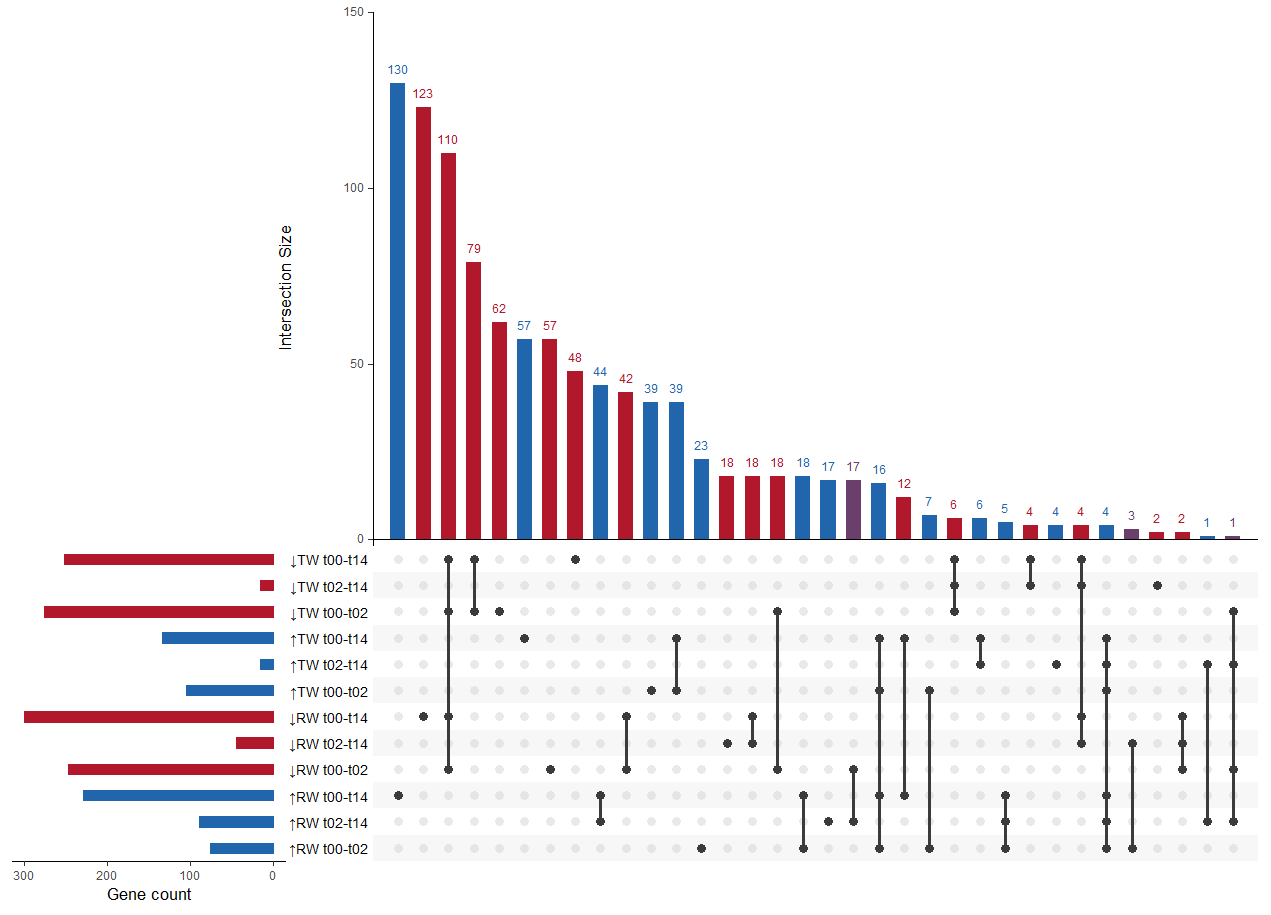


Supplementary Figure S7: Upset Plot depicting the abundance of differentially expressed genes (DEGs) in the wild-type *Escherichia coli* (Ec1) after incubation in river water (Ryck) and tap water (TW). The intersection matrix (bottom) shows overlapping DEGs between the different water types after incubation for 2 days (t00-t02), 14 days (t00-t14), and between day 2 and 14 (t02-t14). Differential expression is divided into down- (↓; red) and upregulation (↑; blue). Overlaps between down- and upregulated genes are marked with purple.


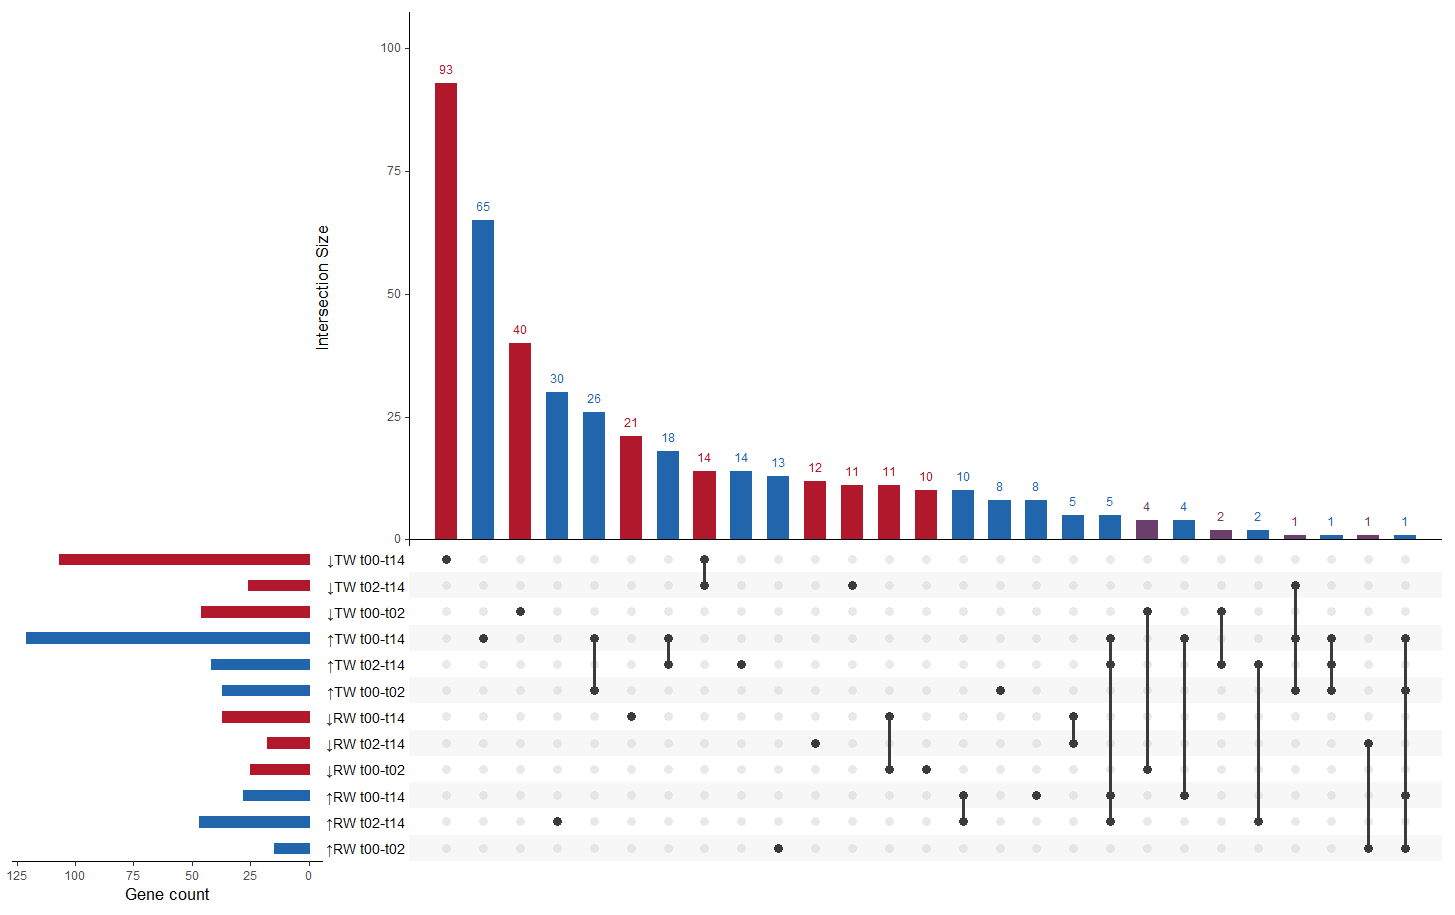


**Supplementary Figure S8: Upset Plot depicting the abundance of differentially expressed genes (DEGs) in wild-type *Escherichia coli* (Ec2) after incubation in river water (Ryck) and tap water (TW).** The intersection matrix (bottom) shows overlapping DEGs between the different water types after incubation for 2 days (t00-t02), 14 days (t00-t14), and between day 2 and 14 (t02-t14). Differential expression is divided into down- (↓; red) and upregulation (↑; blue). Overlaps between down- and upregulated genes are marked with purple.


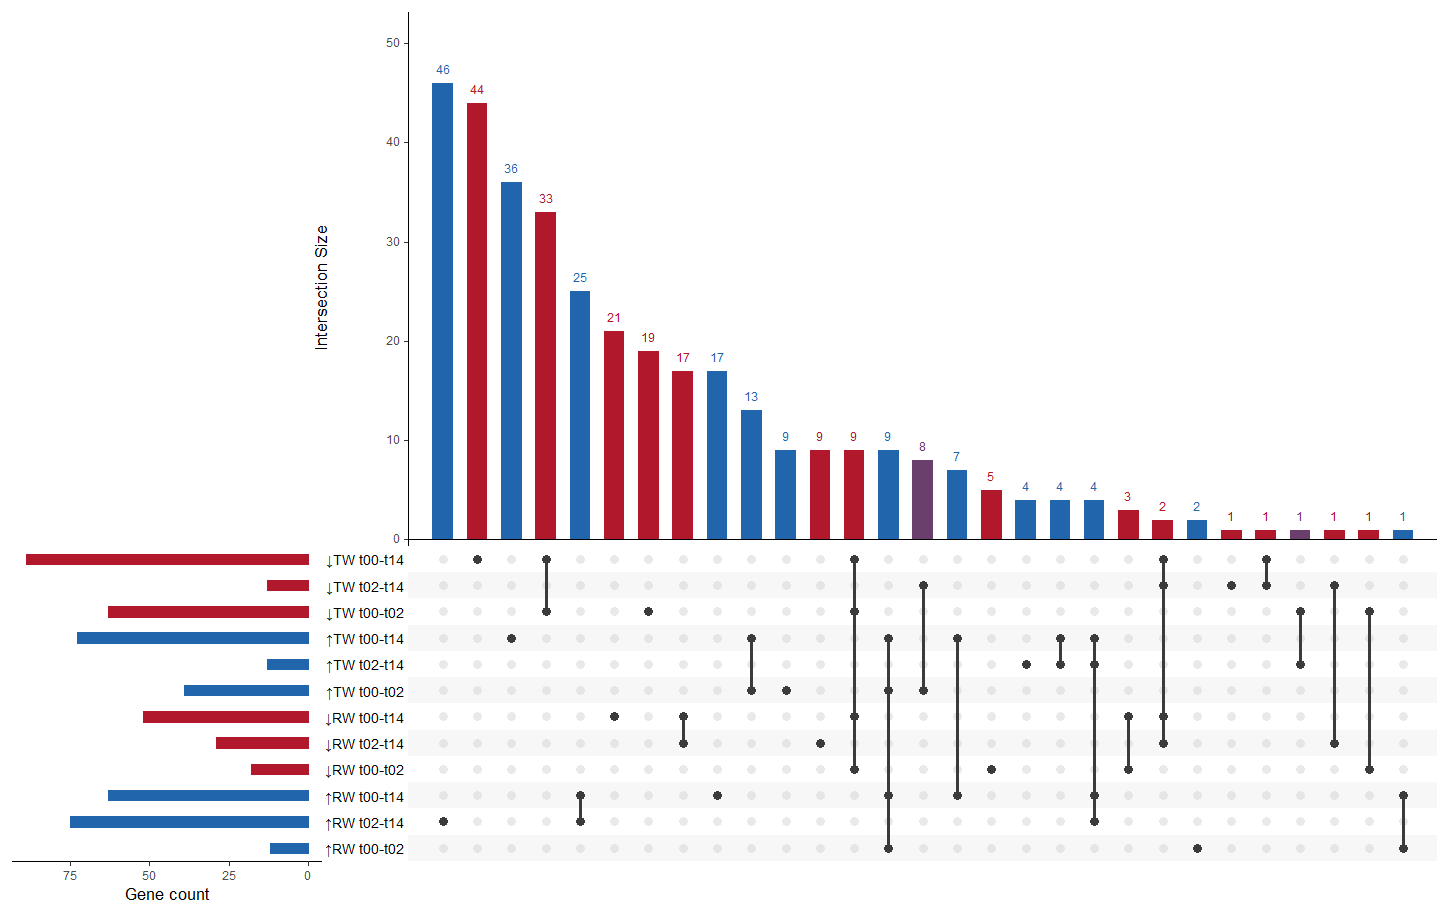


Supplementary Figure S9: Upset Plot depicting the abundance of differentially expressed genes (DEGs) in plasmid-cured *Escherichia coli* (PCV-Ec2) after incubation in river water (Ryck) and tap water (TW). The intersection matrix (bottom) shows overlapping DEGs between the different water types after incubation for 2 days (t00-t02), 14 days (t00-t14), and between day 2 and 14 (t02-t14). Differential expression is divided into down- (↓; red) and upregulation (↑; blue). Overlaps between down- and upregulated genes are marked with purple.


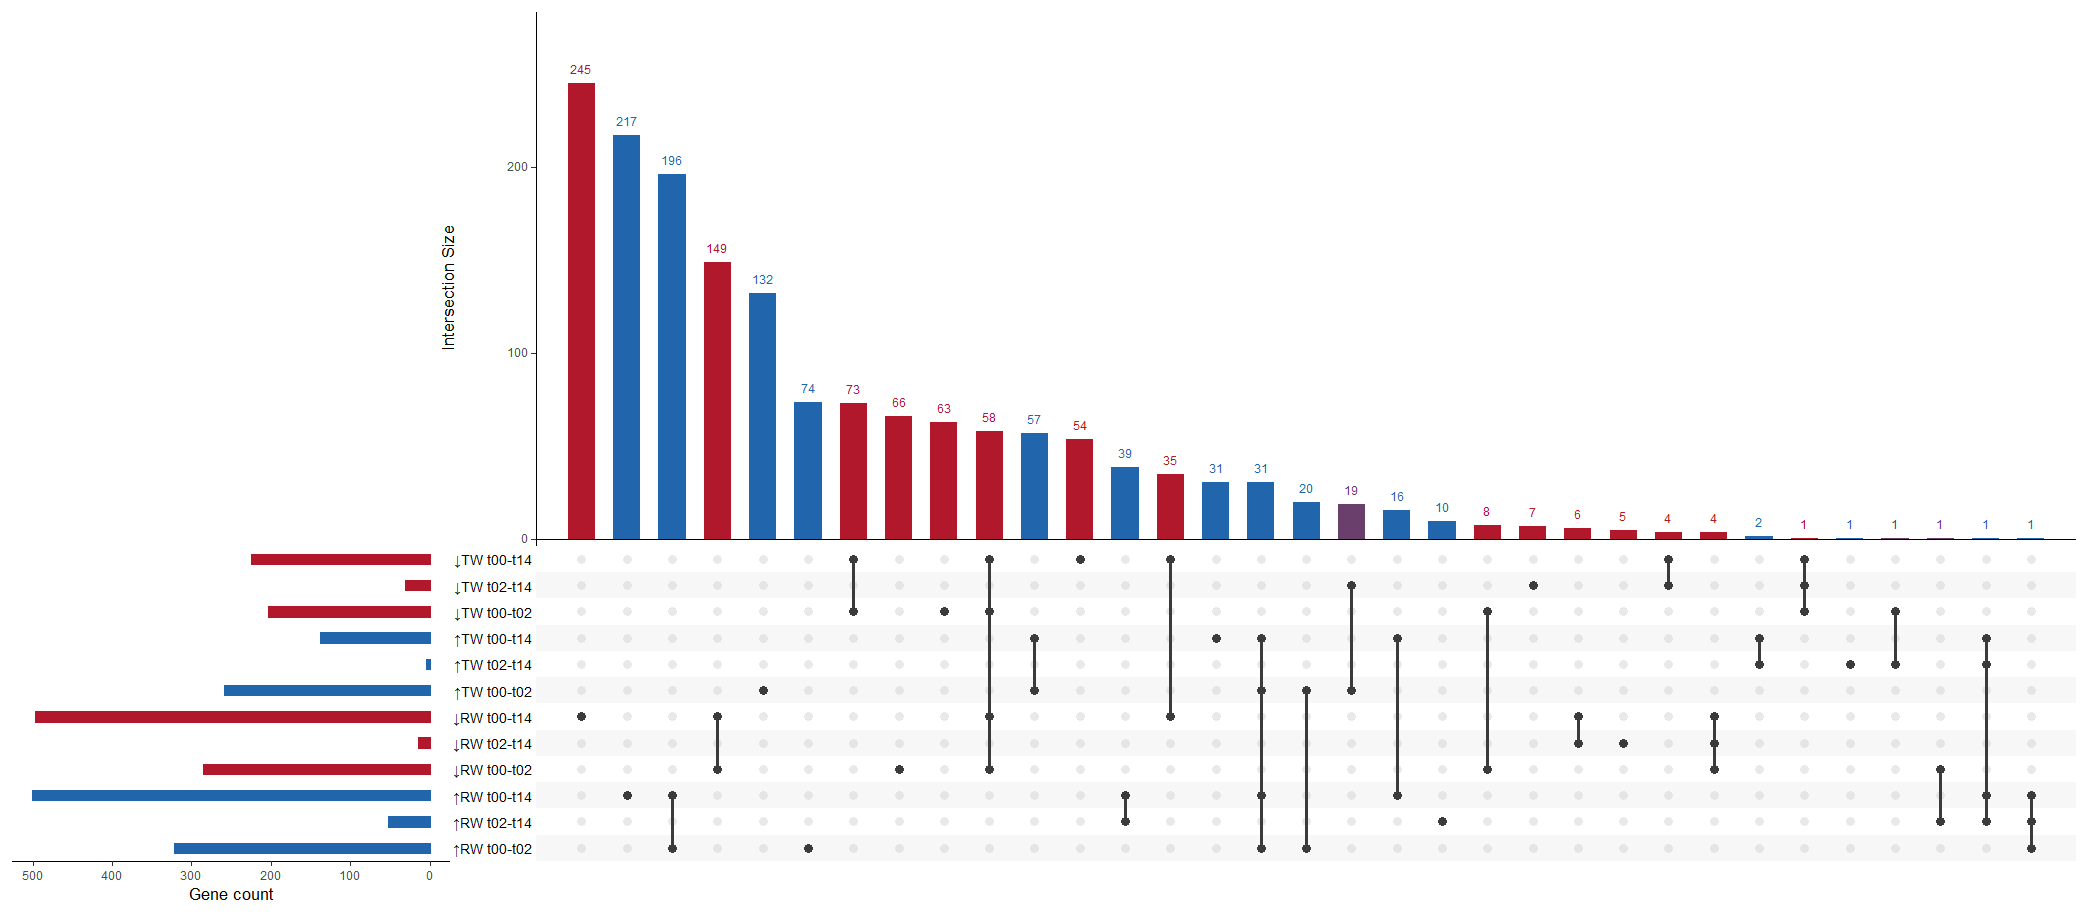


Supplementary Figure S10: Upset Plot depicting the abundance of differentially expressed genes (DEGs) in wild-type *Klebsiella pneumoniae* (Kp) after incubation in river water (Ryck) and tap water (TW). The intersection matrix (bottom) shows overlapping DEGs between the different water types after incubation for 2 days (t00-t02), 14 days (t00-t14), and between day 2 and 14 (t02-t14). Differential expression is divided into down- (↓; red) and upregulation (↑; blue). Overlaps between down- and upregulated genes are marked with purple.


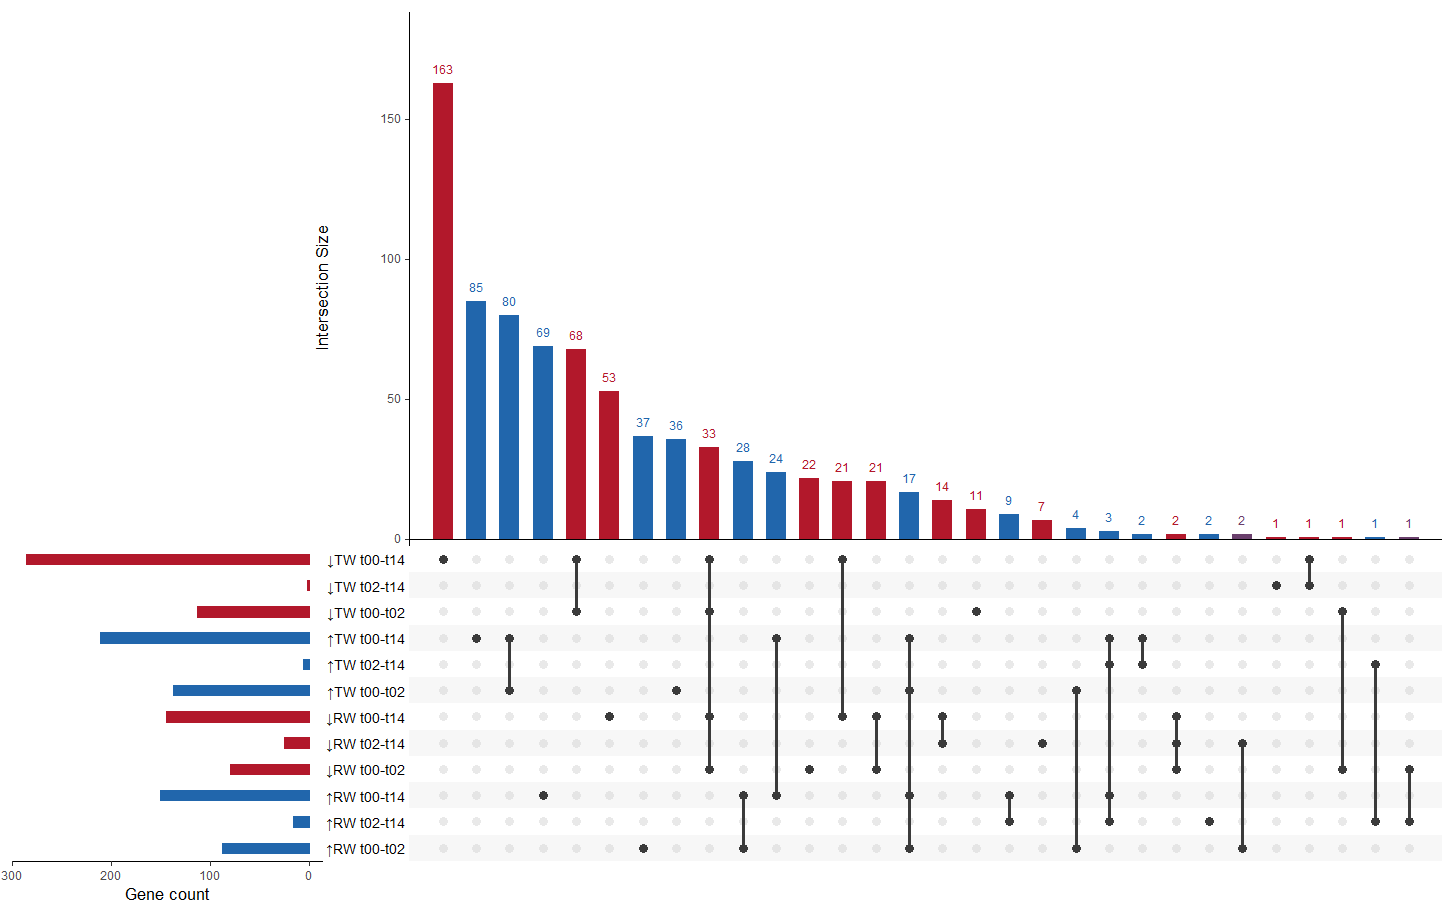


Supplementary Figure S11: Upset Plot depicting the abundance of differentially expressed genes (DEGs) in plasmid-cured *Klebsiella pneumoniae* (PCV-Kp) after incubation in river water (Ryck) and tap water (TW). The intersection matrix (bottom) shows overlapping DEGs between the different water types after incubation for 2 days (t00-t02), 14 days (t00-t14), and between day 2 and 14 (t02-t14). Differential expression is divided into down- (↓; red) and upregulation (↑; blue). Overlaps between down- and upregulated genes are marked with purple.
