# Supplementary material
Source: Research Square preprint supplement (doi:10.21203/rs.3.rs-9425840/v1)
Supplement: Supplementary file 1 [file 182709bd037480baed3ea305.xlsx]

## Sheet: KEGG
Supplementary Data 2: KEGG pathway-based functional classification of differentially expressed genes identified in wild-type strains and plasmid-cured variants (PCVs) of Escherichia coli (Ec1, Ec2, PCV-Ec2) and Klebsiella pneumoniae (Kp, PCV-Kp) following 14-day incubation in river (RW) and tap water (TW).
Unique KEGG entries	Ec1RW	Ec1TW	Ec2RW	Ec2TW	PCV-Ec2RW	PCV-Ec2TW	KpRW	KpTW	PCV-KpRW	PCV-KpTW
00997 Biosynthesis of various other secondary metabolites; Including: Ditryptophenaline biosynthesis, Fumiquinazoline D biosynthesis, Paerucumarin biosynthesis, Staphyloferrin B biosynthesis, Cyclooctatin biosynthesis, Lovastatin biosynthesis, Grixazone biosynthesis, Staphyloferrin A biosynthesis, Ethynylserine biosynthesis, Aerobactin biosynthesis	0	0	0	0	0	0	1	4	0	0
00999 Biosynthesis of various plant secondary metabolites; Including: Crocin biosynthesis, Ginsenoside biosynthesis, Saponin adjuvant biosynthesis, Cannabidiol biosynthesis, Mugineic acid biosynthesis, Pentagalloylglucose biosynthesis, Benzoxazinoid biosynthesis, Gramine biosynthesis, Coumarin biosynthesis, Furanocoumarin biosynthesis, Hordatine biosynthesis, Podophyllotoxin biosynthesis	1	1	0	0	0	0	2	4	1	0
00543 Exopolysaccharide biosynthesis	1	0	0	0	0	0	0	0	0	0
01040 Biosynthesis of unsaturated fatty acids	1	0	0	0	0	0	0	0	0	0
04011 MAPK signaling pathway - yeast	1	0	0	0	0	0	0	0	0	0
04621 NOD-like receptor signaling pathway	1	0	0	0	0	0	0	0	0	0
Immune system	0	0	0	0	0	0	0	0	0	0
03258 Virion - Bacteriophage lambda	1	2	0	0	0	0	0	0	0	0
00603 Glycosphingolipid biosynthesis - globo and isoglobo series	0	1	0	0	0	0	0	0	0	0
Information processing in viruses	0	0	0	0	0	0	0	0	0	0
04626 Plant-pathogen interaction	2	0	1	0	0	0	0	0	0	0
00365 Furfural degradation	0	0	0	1	0	1	0	0	0	0
00600 Sphingolipid metabolism	1	2	0	1	0	2	0	0	0	0
00590 Arachidonic acid metabolism	1	1	0	1	0	0	0	0	0	0
04727 GABAergic synapse	2	2	2	0	3	1	0	0	0	0
04724 Glutamatergic synapse	1	1	1	0	2	1	0	0	0	0
04075 Plant hormone signal transduction	0	0	0	0	1	0	0	0	0	0
04217 Necroptosis	0	0	0	0	1	0	0	0	0	0
04964 Proximal tubule bicarbonate reclamation	1	1	1	0	1	1	0	0	0	0
05206 MicroRNAs in cancer	1	1	1	0	1	1	0	0	0	0
00511 Other glycan degradation	3	3	0	1	1	3	0	0	0	0
00965 Betalain biosynthesis	1	1	1	1	1	1	0	0	0	0
Excretory system	0	0	0	0	0	0	0	0	0	0
Nervous system	0	0	0	0	0	0	0	0	0	0
00760 Nicotinate and nicotinamide metabolism	1	1	0	1	0	0	7	0	0	0
00626 Naphthalene degradation	0	0	0	0	0	0	4	0	0	0
00980 Metabolism of xenobiotics by cytochrome P450	0	0	0	0	0	0	4	0	0	0
00982 Drug metabolism - cytochrome P450	0	0	0	0	0	0	4	0	0	0
00830 Retinol metabolism	0	0	0	0	0	0	3	0	0	0
00730 Thiamine metabolism	1	0	0	0	0	0	3	0	0	0
01502 Vancomycin resistance	1	0	0	0	0	0	3	0	0	0
00523 Polyketide sugar unit biosynthesis	0	0	0	0	0	0	2	0	0	0
00633 Nitrotoluene degradation	0	0	0	0	0	0	2	0	0	0
01524 Platinum drug resistance	0	0	0	0	0	1	2	0	0	0
00521 Streptomycin biosynthesis	1	0	0	0	0	0	2	0	0	0
05200 Pathways in cancer	1	1	0	0	0	0	2	0	0	0
00470 D-Amino acid metabolism	1	1	1	0	1	1	2	0	0	0
00074 Mycolic acid biosynthesis	0	0	0	0	0	0	1	0	0	0
00624 Polycyclic aromatic hydrocarbon degradation	0	0	0	0	0	0	1	0	0	0
00627 Aminobenzoate degradation	0	0	0	0	0	0	1	0	0	0
00946 Degradation of flavonoids	0	0	0	0	0	0	1	0	0	0
01051 Biosynthesis of ansamycins	0	0	0	0	0	0	1	0	0	0
04070 Phosphatidylinositol signaling system	0	0	0	0	0	0	1	0	0	0
04978 Mineral absorption	0	0	0	0	0	1	1	0	0	0
05010 Alzheimer disease	0	0	0	0	0	0	1	0	0	0
05130 Pathogenic Escherichia coli infection	0	0	0	0	0	0	1	0	0	0
05146 Amoebiasis	0	0	0	0	0	0	1	0	0	0
05204 Chemical carcinogenesis - DNA adducts	0	0	0	0	0	0	1	0	0	0
05207 Chemical carcinogenesis - receptor activation	0	0	0	0	0	0	1	0	0	0
05225 Hepatocellular carcinoma	0	0	0	0	0	0	1	0	0	0
05340 Primary immunodeficiency	0	0	0	0	0	0	1	0	0	0
05415 Diabetic cardiomyopathy	0	0	0	0	0	0	1	0	0	0
04016 MAPK signaling pathway - plant	1	0	0	0	0	1	1	0	0	0
05132 Salmonella infection	1	0	0	0	0	0	1	0	0	0
04980 Cobalamin transport and metabolism	0	1	0	0	0	0	1	0	0	0
00983 Drug metabolism - other enzymes	2	1	0	0	0	0	1	0	0	0
04934 Cushing syndrome	1	1	0	0	0	0	1	0	0	0
05211 Renal cell carcinoma	1	1	0	0	0	0	1	0	0	0
05012 Parkinson disease	0	1	0	1	0	0	1	0	0	0
05020 Prion disease	0	1	0	1	0	0	1	0	0	0
05014 Amyotrophic lateral sclerosis	1	1	0	1	0	0	1	0	0	0
05022 Pathways of neurodegeneration - multiple diseases	1	1	0	1	0	0	1	0	0	0
04940 Type I diabetes mellitus	2	1	1	0	1	0	1	0	0	0
Immune disease	0	0	0	0	0	0	0	0	0	0
Infectious disease: parasitic	0	0	0	0	0	0	0	0	0	0
Cancer: specific types	0	0	0	0	0	0	0	0	0	0
03010 Ribosome	0	0	0	12	0	6	2	3	0	0
04068 FoxO signaling pathway	2	1	0	1	0	0	0	1	0	0
04211 Longevity regulating pathway	2	1	0	1	0	0	0	1	0	0
04013 MAPK signaling pathway - fly	1	1	0	1	0	0	0	1	0	0
04212 Longevity regulating pathway - worm	4	2	0	2	0	0	3	1	0	0
05208 Chemical carcinogenesis - reactive oxygen species	2	2	0	2	0	0	2	1	0	0
05152 Tuberculosis	2	1	0	1	0	0	2	1	0	0
01310 Nitrogen cycle	0	0	0	0	0	0	1	1	0	0
00450 Selenocompound metabolism	2	0	0	0	0	0	1	1	0	0
04213 Longevity regulating pathway - multiple species	3	2	0	2	0	0	1	1	0	0
05016 Huntington disease	1	2	0	2	0	0	1	1	0	0
05417 Lipid and atherosclerosis	2	1	0	1	0	0	1	1	0	0
Aging	0	0	0	0	0	0	0	0	0	0
Neurodegenerative disease	0	0	0	0	0	0	0	0	0	0
00562 Inositol phosphate metabolism	1	0	0	0	0	0	6	0	3	0
00592 alpha-Linolenic acid metabolism	0	0	0	0	0	0	0	0	1	0
00642 Ethylbenzene degradation	0	0	0	0	0	0	0	0	1	0
00907 Pinene, camphor and geraniol degradation	0	0	0	0	0	0	0	0	1	0
00130 Ubiquinone and other terpenoid-quinone biosynthesis	0	0	0	0	0	0	5	0	1	0
05111 Biofilm formation - Vibrio cholerae	4	0	1	2	1	3	3	0	1	0
05418 Fluid shear stress and atherosclerosis	0	0	0	1	1	0	2	0	1	0
00984 Steroid degradation	0	0	0	0	0	0	1	0	1	0
04382 Cornified envelope formation	0	0	0	0	0	0	1	0	1	0
Development and regeneration	0	0	0	0	0	0	0	0	0	0
Cardiovascular disease	0	0	0	0	0	0	0	0	0	0
01100 Metabolic pathways	123	69	25	57	35	38	227	108	80	134
01120 Microbial metabolism in diverse environments	41	21	7	13	10	11	71	39	40	56
01110 Biosynthesis of secondary metabolites	54	27	11	25	17	13	80	37	29	44
02010 ABC transporters	33	23	8	35	8	25	60	34	25	43
02020 Two-component system	34	26	9	24	9	25	40	21	10	25
01200 Carbon metabolism	21	8	2	4	0	0	31	13	15	21
02024 Quorum sensing	14	9	4	9	5	5	23	13	9	18
01240 Biosynthesis of cofactors	8	4	2	9	3	2	47	16	7	16
01230 Biosynthesis of amino acids	19	14	7	17	14	8	25	14	12	15
00051 Fructose and mannose metabolism	9	3	1	2	0	0	12	3	6	12
01220 Degradation of aromatic compounds	0	0	0	0	0	0	8	6	5	11
01501 beta-Lactam resistance	10	9	1	3	1	2	8	2	4	11
00620 Pyruvate metabolism	15	9	1	2	1	1	18	5	6	10
00020 Citrate cycle (TCA cycle)	12	3	0	1	0	0	11	7	5	10
00350 Tyrosine metabolism	0	0	0	0	0	0	9	8	7	9
00010 Glycolysis / Gluconeogenesis	8	4	1	2	1	1	19	3	6	9
02060 Phosphotransferase system (PTS)	4	2	0	0	1	0	17	2	6	9
00650 Butanoate metabolism	7	6	4	5	4	3	7	6	2	9
01210 2-Oxocarboxylic acid metabolism	7	5	3	9	7	3	11	6	5	8
00362 Benzoate degradation	0	1	0	1	0	0	3	2	5	8
00720 Other carbon fixation pathways	9	4	0	2	0	0	11	5	4	8
00240 Pyrimidine metabolism	8	4	2	6	3	2	8	6	1	8
00790 Folate biosynthesis	3	0	1	0	3	0	5	0	0	7
00500 Starch and sucrose metabolism	5	1	0	1	0	0	11	9	4	7
00920 Sulfur metabolism	8	0	0	0	0	0	5	6	2	7
00910 Nitrogen metabolism	4	2	1	2	3	2	5	6	0	6
00630 Glyoxylate and dicarboxylate metabolism	5	3	1	4	1	1	7	2	5	6
00040 Pentose and glucuronate interconversions	8	4	3	1	1	2	4	4	3	6
00053 Ascorbate and aldarate metabolism	1	1	1	1	1	1	4	3	3	6
00260 Glycine, serine and threonine metabolism	7	4	3	3	2	3	6	4	2	6
04122 Sulfur relay system	4	2	0	1	0	0	3	0	0	5
00640 Propanoate metabolism	8	3	1	2	2	2	14	10	6	5
00280 Valine, leucine and isoleucine degradation	2	3	1	3	2	2	3	2	4	5
00860 Porphyrin metabolism	1	0	0	0	0	0	27	16	3	5
00052 Galactose metabolism	9	8	0	2	2	3	4	5	3	5
01503 Cationic antimicrobial peptide (CAMP resistance)	5	3	0	2	0	0	17	7	2	5
00330 Arginine and proline metabolism	9	8	2	8	6	4	3	2	2	5
00541 Biosynthesis of various nucleotide sugars	5	1	2	3	0	5	6	4	0	4
00230 Purine metabolism	8	1	1	3	2	3	8	3	0	4
00190 Oxidative phosphorylation	6	0	0	0	0	0	6	3	0	4
00400 Phenylalanine, tyrosine and tryptophan biosynthesis	7	1	0	0	1	0	5	4	4	4
00660 C5-Branched dibasic acid metabolism	2	2	1	2	1	1	3	3	2	4
03070 Bacterial secretion system	0	1	0	0	2	1	4	3	0	3
01232 Nucleotide metabolism	9	3	3	2	3	1	7	2	0	3
00290 Valine, leucine and isoleucine biosynthesis	0	2	1	2	1	1	2	2	0	3
00770 Pantothenate and CoA biosynthesis	1	4	2	5	2	2	4	1	0	3
00360 Phenylalanine metabolism	0	0	0	0	0	0	3	2	11	3
00030 Pentose phosphate pathway	3	2	0	2	0	0	9	2	4	3
01212 Fatty acid metabolism	2	1	0	1	0	0	4	2	4	3
00270 Cysteine and methionine metabolism	7	3	2	0	1	1	10	1	4	3
00520 Amino sugar and nucleotide sugar metabolism	7	1	1	0	1	1	11	3	3	3
00710 Carbon fixation by Calvin cycle	2	1	0	0	0	0	6	2	3	3
00071 Fatty acid degradation	2	2	1	2	1	1	6	2	3	3
00680 Methane metabolism	3	2	1	1	0	0	9	1	3	3
03430 Mismatch repair	3	2	0	0	0	0	7	0	2	3
00740 Riboflavin metabolism	0	0	0	0	0	0	4	3	2	3
00310 Lysine degradation	3	4	1	3	2	2	4	3	2	3
00785 Lipoic acid metabolism	4	0	0	0	0	0	3	2	2	3
00380 Tryptophan metabolism	3	2	1	2	1	1	2	2	2	3
00300 Lysine biosynthesis	2	2	1	2	2	2	6	1	2	3
00561 Glycerolipid metabolism	2	2	2	2	1	1	2	1	2	3
01250 Biosynthesis of nucleotide sugars	7	0	2	2	0	4	10	5	1	3
00540 Lipopolysaccharide biosynthesis	2	5	0	3	0	0	9	4	1	3
03060 Protein export	0	0	0	0	0	1	2	3	0	2
00970 Aminoacyl-tRNA biosynthesis	2	1	0	1	0	0	6	1	0	2
03030 DNA replication	3	2	0	0	0	0	5	0	3	2
00250 Alanine, aspartate and glutamate metabolism	7	6	4	11	8	6	7	6	3	2
02026 Biofilm formation - Escherichia coli	8	6	1	7	2	4	8	3	2	2
00410 beta-Alanine metabolism	4	4	3	3	4	3	2	3	2	2
00900 Terpenoid backbone biosynthesis	0	1	0	1	0	0	5	2	2	2
03320 PPAR signaling pathway	2	0	1	0	0	0	2	2	2	2
05133 Pertussis	2	3	3	3	2	3	2	2	2	2
00670 One carbon pool by folate	4	3	1	2	2	2	5	1	2	2
00061 Fatty acid biosynthesis	2	0	0	0	0	0	3	1	2	2
00780 Biotin metabolism	2	1	0	0	0	0	2	0	1	2
01320 Sulfur cycle	5	0	0	0	0	0	0	2	1	2
04216 Ferroptosis	1	0	0	0	0	0	1	2	1	2
02025 Biofilm formation - Pseudomonas aeruginosa	3	0	0	1	1	0	4	1	1	2
00361 Chlorocyclohexane and chlorobenzene degradation	0	1	0	0	0	0	0	0	0	1
00364 Fluorobenzoate degradation	0	1	0	0	0	0	0	0	0	1
00903 Limonene degradation	1	1	1	1	1	1	0	0	0	1
00981 Insect hormone biosynthesis	1	1	1	1	1	1	0	0	0	1
03410 Base excision repair	2	2	0	0	0	0	5	0	0	1
00625 Chloroalkane and chloroalkene degradation	1	1	1	1	1	1	4	0	0	1
01053 Biosynthesis of siderophore group nonribosomal peptides	1	5	0	0	0	0	3	0	0	1
04112 Cell cycle - Caulobacter	0	1	0	0	0	0	3	0	0	1
00750 Vitamin B6 metabolism	0	0	0	0	0	0	2	0	0	1
00440 Phosphonate and phosphinate metabolism	0	0	0	0	0	0	1	0	0	1
05134 Legionellosis	3	0	0	0	0	0	1	0	0	1
00623 Toluene degradation	0	1	0	0	0	0	1	0	0	1
03420 Nucleotide excision repair	2	1	0	0	0	0	1	0	0	1
02040 Flagellar assembly	8	3	1	9	2	3	1	0	0	1
04936 Alcoholic liver disease	1	1	1	1	1	1	1	0	0	1
00261 Monobactam biosynthesis	3	2	1	1	1	2	2	2	0	1
00480 Glutathione metabolism	2	1	0	0	0	1	4	1	0	1
00460 Cyanoamino acid metabolism	0	0	0	0	0	0	3	1	0	1
01523 Antifolate resistance	0	0	0	0	0	0	2	1	0	1
04981 Folate transport and metabolism	0	0	0	0	0	0	2	1	0	1
00430 Taurine and hypotaurine metabolism	1	1	1	0	1	0	2	1	0	1
00552 Teichoic acid biosynthesis	0	0	0	0	0	0	1	1	0	1
00791 Atrazine degradation	0	0	0	0	0	0	1	1	0	1
04214 Apoptosis - fly	1	1	0	0	0	0	1	1	0	1
00220 Arginine biosynthesis	5	5	4	12	10	4	5	2	4	1
03440 Homologous recombination	2	1	0	1	0	0	10	0	3	1
00340 Histidine metabolism	2	2	1	2	1	2	3	0	2	1
00643 Styrene degradation	0	0	0	0	0	0	2	1	2	1
02030 Bacterial chemotaxis	7	0	0	3	0	1	2	1	2	1
05110 Vibrio cholerae infection	0	0	0	0	0	0	0	0	1	1
03018 RNA degradation	3	2	0	1	0	0	5	0	1	1
04066 HIF-1 signaling pathway	0	0	0	0	0	0	2	0	1	1
00333 Prodigiosin biosynthesis	0	0	0	0	0	0	1	0	1	1
04152 AMPK signaling pathway	0	0	0	0	0	0	1	0	1	1
04919 Thyroid hormone signaling pathway	0	0	0	0	0	0	1	0	1	1
04922 Glucagon signaling pathway	0	0	0	0	0	0	1	0	1	1
05230 Central carbon metabolism in cancer	1	1	1	0	1	1	1	0	1	1
04146 Peroxisome	4	3	0	2	0	0	2	2	1	1
00564 Glycerophospholipid metabolism	1	0	0	0	0	0	1	2	1	1
00550 Peptidoglycan biosynthesis	2	0	0	0	0	0	10	1	1	1
00622 Xylene degradation	0	0	0	0	0	0	2	1	1	1
00621 Dioxin degradation	0	0	0	0	0	0	1	1	1	1
00950 Isoquinoline alkaloid biosynthesis	0	0	0	0	0	0	1	1	1	1
00960 Tropane, piperidine and pyridine alkaloid biosynthesis	0	0	0	0	0	0	1	1	1	1
04714 Thermogenesis	1	0	0	0	0	0	1	1	1	1
04920 Adipocytokine signaling pathway	1	0	0	0	0	0	1	1	1	1
04975 Fat digestion and absorption	0	1	0	1	0	0	1	1	1	1
00405 Phenazine biosynthesis	1	0	0	0	1	0	1	1	1	1
05131 Shigellosis	3	2	1	1	1	1	1	1	1	1
Endocrine and metabolic disease	0	0	0	0	0	0	0	0	0	0
Drug resistance: antineoplastic	0	0	0	0	0	0	0	0	0	0
Translation	0	0	0	0	0	0	0	0	0	0
Replication and repair	0	0	0	0	0	0	0	0	0	0
Endocrine system	0	0	0	0	0	0	0	0	0	0
Environmental adaptation	0	0	0	0	0	0	0	0	0	0
Digestive system	0	0	0	0	0	0	0	0	0	0
Folding, sorting and degradation	0	0	0	0	0	0	0	0	0	0
Genetic Information Processing	0	0	0	0	0	0	0	0	0	0
Transport and catabolism	0	0	0	0	0	0	0	0	0	0
Cell growth and death	0	0	0	0	0	0	0	0	0	0
Amino acid metabolism	0	0	0	0	0	0	0	0	0	0
Biosynthesis of other secondary metabolites	0	0	0	0	0	0	0	0	0	0
Cancer: overview	0	0	0	0	0	0	0	0	0	0
Carbohydrate metabolism	0	0	0	0	0	0	0	0	0	0
Cell motility	0	0	0	0	0	0	0	0	0	0
Cellular Processes	0	0	0	0	0	0	0	0	0	0
Cellular community - prokaryotes	0	0	0	0	0	0	0	0	0	0
Drug resistance: antimicrobial	0	0	0	0	0	0	0	0	0	0
Energy metabolism	0	0	0	0	0	0	0	0	0	0
Environmental Information Processing	0	0	0	0	0	0	0	0	0	0
Global and overview maps	0	0	0	0	0	0	0	0	0	0
Glycan biosynthesis and metabolism	0	0	0	0	0	0	0	0	0	0
Human Diseases	0	0	0	0	0	0	0	0	0	0
Infectious disease: bacterial	0	0	0	0	0	0	0	0	0	0
Lipid metabolism	0	0	0	0	0	0	0	0	0	0
Membrane transport	0	0	0	0	0	0	0	0	0	0
Metabolism	0	0	0	0	0	0	0	0	0	0
Metabolism of cofactors and vitamins	0	0	0	0	0	0	0	0	0	0
Metabolism of other amino acids	0	0	0	0	0	0	0	0	0	0
Metabolism of terpenoids and polyketides	0	0	0	0	0	0	0	0	0	0
Nucleotide metabolism	0	0	0	0	0	0	0	0	0	0
Organismal Systems	0	0	0	0	0	0	0	0	0	0
Signal transduction	0	0	0	0	0	0	0	0	0	0
Xenobiotics biodegradation and metabolism	0	0	0	0	0	0	0	0	0	0
