# Supplementary material
Source: Research Square preprint supplement (doi:10.21203/rs.3.rs-9425840/v1)
Supplement: Supplementary file 2 [file b9097436576bfcd809d069a6.docx]

**Supplementary Table S1: Deleted plasmid-encoded genes in the plasmid-cured variants (PCV-Ec2, PCV-Kp) of Escherichia coli (Ec2) and Klebsiella pneumoniae (Kp) used for analysis of transcriptomic adaptations as a response to river water and tap water.**

| **Strain** | **Plasmid** | **Deleted genes** | **Locus Tag** |
| --- | --- | --- | --- |
| PCV-Ec2 | ESBL-plasmid | *elfADC* | PB730EC_24350–PB730EC_24360 |
|  |  | *ssuABCDE* | PB730EC_24365–PB730EC_24385 |
|  |  | *pepN* | PB730EC_24390 |
|  |  | *insH5* | PB730EC_24405 |
|  |  | *traABCEFKLMNUVWX* | PB730EC_24410, PB730EC_24420, PB730EC_24445, PB730EC_24450, PB730EC_24460, PB730EC_24475, PB730EC_24490–PB730EC_24510, PB730EC_24525 |
|  |  | *trbC* | PB730EC_24425 |
|  |  | *ybiI* | PB730EC_24470 |
|  |  | *yfjQ* | PB730EC_24535 |
|  |  | *insJK* | PB730EC_24555, PB730EC_24560 |
|  |  | *psiAB* | PB730EC_24565, PB730EC_24570 |
|  |  | *ssb* | PB730EC_24585 |
|  |  | *ccdAB* | PB730EC_24680, PB730EC_24685 |
|  |  | *vagC* | PB730EC_24710 |
|  |  | *vapC* | PB730EC_24715 |
|  |  | *hsdMRS* | PB730EC_24740–PB730EC_24750 |
|  |  | *doc* | PB730EC_24760 |
|  |  | *tetAR* | PB730EC_24825, PB730EC_24830 |
|  |  | *istB3* | PB730EC_24860 |
|  |  | *bla*TEM-1 | PB730EC_24970 |
|  |  | *mph*(A) | PB730EC_24985 |
|  |  | *repA1* | PB730EC_24880 |
|  |  | *pemIK* | PB730EC_24890, PB730EC_24895 |
|  |  | *pecM* | PB730EC_24915 |
|  |  | *chrA* | PB730EC_25010 |
|  |  | *sul12* | PB730EC_25020, PB730EC_25095 |
|  |  | *qacEdelta1* | PB730EC_25025 |
|  |  | *aadA5* | PB730EC_25030 |
|  |  | *dfrA17* | PB730EC_25035 |
|  |  | *int* | PB730EC_25045 |
|  |  | *tnpA* | PB730EC_25060 |
|  |  | *bla*CTX-M-15 | PB730EC_25070 |
|  |  | *aph(6)-Id* | PB730EC_25085 |
|  |  | *aph(3'')-Ib* | PB730EC_25090 |
|  |  | *aac(3)-IId* | PB730EC_25130 |
|  |  | *repC* | PB730EC_25165 |
|  |  | *finO* | PB730EC_25180 |
| PCV-Kp | carbapenemase-encoding plasmid | *dsbC* | PBIO1953KP_26625 |
|  |  | *bcfH* | PBIO1953KP_26640 |
|  |  | *hemB* | PBIO1953KP_26760 |
|  |  | *pyrC* | PBIO1953KP_26765 |
|  |  | *thrS* | PBIO1953KP_26775 |
|  |  | *folE2* | PBIO1953KP_26795 |
|  |  | *dksA3* | PBIO1953KP_26800 |
|  |  | *fur* | PBIO1953KP_26810 |
|  |  | *cysS* | PBIO1953KP_26815 |
|  |  | *hisI* | PBIO1953KP_26840 |
|  |  | *dkgA* | PBIO1953KP_26900 |
|  |  | *hns* | PBIO1953KP_26910 |
|  |  | *pagO* | PBIO1953KP_26935 |
|  |  | *insA2* | PBIO1953KP_26955 |
|  |  | *fecD* | PBIO1953KP_26990 |
|  |  | *def* | PBIO1953KP_27020 |
|  |  | *iucABCD* | PBIO1953KP_27040–PBIO1953KP_27055 |
|  |  | *iutA* | PBIO1953KP_27060 |
|  |  | *bhsA* | PBIO1953KP_27070 |
|  |  | *yxaF* | PBIO1953KP_27075 |
|  |  | *vapC* | PBIO1953KP_27110 |
|  |  | *vagC* | PBIO1953KP_27115 |
|  |  | *ybaO* | PBIO1953KP_27165 |
|  |  | *pin* | PBIO1953KP_27195 |
|  |  | *cicA* | PBIO1953KP_27210 |
|  |  | *terABCDEWXYZ* | PBIO1953KP_27220– PBIO1953KP_24245, PBIO1953KP_27280– PBIO1953KP_27290 |
|  |  | *stiP* | PBIO1953KP_27265 |
|  |  | *neo* | PBIO1953KP_27325 |
|  |  | *chrA* | PBIO1953KP_27360 |
|  |  | *int* | PBIO1953KP_27395 |
|  |  | *cutA* | PBIO1953KP_27405 |
|  |  | *trpF* | PBIO1953KP_27415 |
|  |  | *ble* | PBIO1953KP_27420 |
|  |  | *bla*NDM-1 | PBIO1953KP_27425 |
|  |  | *insI* | PBIO1953KP_27435 |
|  |  | *aph(3')-VI* | PBIO1953KP_27440 |
|  |  | *qnrS1* | PBIO1953KP_27460 |
|  |  | *tnpA* | PBIO1953KP_27480 |
|  |  | *folK* | PBIO1953KP_27535 |
|  | Plasmid 3 | *sopB* | PBIO1953KP_28770 |
|  |  | *repA1* | PBIO1953KP_28780 |
|  |  | *umuCD* | PBIO1953KP_28840, PBIO1953KP_28845 |
|  |  | *ssb* | PBIO1953KP_28895 |
|  |  | *ykfF* | PBIO1953KP_28900 |
|  |  | *psiAB* | PBIO1953KP_28910, PBIO1953KP_28915 |
|  |  | *iagB* | PBIO1953KP_28970 |
|  |  | *traABCDEFHKLNQUVW* | PBIO1953KP_28990–PBIO1953KP_29015, PBIO1953KP_29055, PBIO1953KP_29065, PBIO1953KP_29070, PBIO1953KP_29095, PBIO1953KP_29115, PBIO1953KP_29135, PBIO1953KP_29165 |
|  |  | *trbCE* | PBIO1953KP_29090, PBIO1953KP_29100 |
|  |  | *ylpA* | PBIO1953KP_29155 |
|  |  | *trwC* | PBIO1953KP_29170 |

**Supplementary Table S2: Number of annotated genes and classification into chromosomal and plasmid-encoded genes of Escherichia coli (Ec1, Ec2), Klebsiella pneumoniae (Kp) and the plasmid-cured variants (PCV-Ec2, PCV-Kp).**

| Strain | Total | Chromosome | Plasmid |
| --- | --- | --- | --- |
| Ec1 | 4629 | - | - |
| Ec2 | 4547 | 4373 | 174 (174) |
| PCV-Ec2 | 4391 | 4391 | 0 |
| Kp | 5381 | 4686 | 695 (294) |
| PCV-Kp | 5128 | 4727 | 401 |

**Supplementary Table S3: Colony-forming units of the survival experiment for Escherichia coli (Ec1, Ec2) and Klebsiella pneumoniae (Kp), as well as their respective plasmid‑cured variants (PCV-Ec2, PCV-Kp) in river water (RW) and tap water (TW) adjusted to a starting concentration of OD600 0.2.**

| Strain | Inoculation | | Day 2 | | Day 7 | | Day 14 | |
| --- | --- | --- | --- | --- | --- | --- | --- | --- |
| RW | TW | RW | TW | RW | TW | RW | TW |
| Ec1 | 1.25 × 108 | 1.08 × 108 | 2.68 × 108 | 1.37 × 108 | 2.45 × 108 | 1.68 × 108 | 2.20 × 108 | 1.46 × 108 |
| 1.50 × 108 | 8.00 × 107 | 3.17 × 108 | 1.00 × 108 | 2.90 × 108 | 1.20 × 108 | 2.65 × 108 | 1.18 × 108 |
| 1.45 × 108 | 8.20 × 107 | 3.00 × 108 | 1.08 × 108 | 2.75 × 108 | 1.32 × 108 | 2.50 × 108 | 1.26 × 108 |
| Ec2 | 1.25 × 108 | 1.12 × 108 | 2.45 × 108 | 1.55 × 108 | 2.40 × 108 | 1.80 × 108 | 2.15 × 108 | 1.63 × 108 |
| 1.50 × 108 | 7.80 × 107 | 2.95 × 108 | 1.05 × 108 | 2.85 × 108 | 1.30 × 108 | 2.60 × 108 | 1.30 × 108 |
| 1.48 × 108 | 8.00 × 107 | 2.88 × 108 | 1.15 × 108 | 2.70 × 108 | 1.39 × 108 | 2.45 × 108 | 1.42 × 108 |
| PCV-Ec2 | 1.20 × 108 | 1.05 × 108 | 2.35 × 108 | 1.62 × 108 | 2.50 × 108 | 1.91 × 108 | 2.25 × 108 | 1.68 × 108 |
| 1.45 × 108 | 7.20 × 107 | 2.80 × 108 | 1.10 × 108 | 3.00 × 108 | 1.35 × 108 | 2.70 × 108 | 1.35 × 108 |
| 1.40 × 108 | 7.80 × 107 | 2.65 × 108 | 1.18 × 108 | 2.87 × 108 | 1.40 × 108 | 2.55 × 108 | 1.47 × 108 |
| Kp | 1.30 × 108 | 1.30 × 108 | 2.20 × 108 | 1.78 × 108 | 2.30 × 108 | 2.15 × 108 | 2.10 × 108 | 1.89 × 108 |
| 1.55 × 108 | 9.10 × 107 | 2.70 × 108 | 1.35 × 108 | 2.75 × 108 | 1.52 × 108 | 2.50 × 108 | 1.61 × 108 |
| 1.50 × 108 | 9.10 × 107 | 2.60 × 108 | 1.37 × 108 | 2.60 × 108 | 1.74 × 108 | 2.40 × 108 | 1.60 × 108 |
| PCV-Kp | 1.35 × 108 | 1.40 × 108 | 2.60 × 108 | 1.92 × 108 | 2.55 × 108 | 2.30 × 108 | 2.35 × 108 | 2.08 × 108 |
| 1.60 × 108 | 9.50 × 107 | 3.10 × 108 | 1.45 × 108 | 3.00 × 108 | 1.81 × 108 | 2.80 × 108 | 1.70 × 108 |
| 1.55 × 108 | 9.80 × 107 | 3.00 × 108 | 1.46 × 108 | 2.85 × 108 | 1.75 × 108 | 2.65 × 108 | 1.77 × 108 |

**Supplementary Table S4: CFUs of the survival experiment for Escherichia coli (Ec1, Ec2) and Klebsiella pneumoniae (Kp), as well as their respective plasmid‑cured variants (PCV-Ec2, PCV-Kp) in river water (RW) and tap water (TW) adjusted to a starting concentration of OD600 0.1.**

| Strain | Inoculation | | Day 2 | | Day 7 | | Day 14 | |
| --- | --- | --- | --- | --- | --- | --- | --- | --- |
| RW | TW | RW | TW | RW | TW | RW | TW |
| Ec1 | 4.27 × 107 | 6.00 × 107 | 8.40 × 107 | 9.00 × 107 | 7.55 × 107 | 8.00 × 107 | 1.07 × 108 | 8.40 × 107 |
| 5.27 × 107 | 4.30 × 107 | 1.04 × 108 | 6.40 × 107 | 9.35 × 107 | 6.00 × 107 | 1.31 × 108 | 6.00 × 107 |
| 4.77 × 107 | 4.70 × 107 | 9.40 × 107 | 7.40 × 107 | 8.45 × 107 | 6.90 × 107 | 1.19 × 108 | 6.90 × 107 |
| Ec2 | 4.00 × 107 | 4.80 × 107 | 8.00 × 107 | 7.10 × 107 | 7.20 × 107 | 6.20 × 107 | 1.05 × 108 | 6.80 × 107 |
| 5.00 × 107 | 3.40 × 107 | 9.80 × 107 | 5.30 × 107 | 9.00 × 107 | 4.50 × 107 | 1.25 × 108 | 5.00 × 107 |
| 4.50 × 107 | 3.80 × 107 | 8.90 × 107 | 5.60 × 107 | 8.10 × 107 | 4.90 × 107 | 1.15 × 108 | 5.30 × 107 |
| PCV-Ec2 | 4.15 × 107 | 5.60 × 107 | 8.30 × 107 | 7.90 × 107 | 7.65 × 107 | 7.00 × 107 | 1.03 × 108 | 7.70 × 107 |
| 5.15 × 107 | 4.10 × 107 | 1.03 × 108 | 6.50 × 107 | 9.45 × 107 | 5.70 × 107 | 1.27 × 108 | 5.80 × 107 |
| 4.65 × 107 | 4.40 × 107 | 9.30 × 107 | 6.00 × 107 | 8.55 × 107 | 5.00 × 107 | 1.15 × 108 | 6.00 × 107 |
| Kp | 4.36 × 107 | 7.00 × 107 | 8.55 × 107 | 1.05 × 108 | 7.90 × 107 | 9.20 × 107 | 1.15 × 108 | 9.90 × 107 |
| 5.20 × 107 | 5.20 × 107 | 1.05 × 108 | 7.50 × 107 | 9.90 × 107 | 6.50 × 107 | 1.35 × 108 | 7.00 × 107 |
| 4.70 × 107 | 5.50 × 107 | 9.70 × 107 | 8.40 × 107 | 8.90 × 107 | 7.40 × 107 | 1.25 × 108 | 8.00 × 107 |
| PCV-Kp | 4.40 × 107 | 6.20 × 107 | 8.80 × 107 | 9.30 × 107 | 7.60 × 107 | 8.10 × 107 | 1.08 × 108 | 8.80 × 107 |
| 5.40 × 107 | 4.50 × 107 | 1.08 × 108 | 6.60 × 107 | 9.60 × 107 | 5.90 × 107 | 1.28 × 108 | 6.20 × 107 |
| 4.93 × 107 | 4.90 × 107 | 9.80 × 107 | 7.50 × 107 | 8.60 × 107 | 6.40 × 107 | 1.18 × 108 | 7.20 × 107 |

**Supplementary Table S5: CFUs of the survival experiment for Escherichia coli (Ec1, Ec2) and Klebsiella pneumoniae (Kp), as well as their respective plasmid‑cured variants (PCV-Ec2, PCV-Kp) in river water (RW) and tap water (TW) adjusted to a starting concentration of OD600 0.01.**

| Strain | Inoculation | | Day 2 | | Day 7 | | Day 14 | |
| --- | --- | --- | --- | --- | --- | --- | --- | --- |
| RW | TW | RW | TW | RW | TW | RW | TW |
| Ec1 | 4.40 × 106 | 4.80 × 106 | 2.05 × 106 | 9.80 × 105 | 1.08 × 107 | 2.50 × 105 | 9.10 × 106 | 1.08 × 105 |
| 5.50 × 106 | 2.90 × 106 | 2.55 × 106 | 7.70 × 105 | 1.32 × 107 | 2.30 × 105 | 1.13 × 107 | 6.70 × 104 |
| 5.00 × 106 | 3.40 × 106 | 2.30 × 106 | 5.60 × 105 | 1.20 × 107 | 2.10 × 105 | 1.02 × 107 | 7.40 × 104 |
| Ec2 | 4.10 × 106 | 3.60 × 106 | 1.95 × 106 | 7.10 × 105 | 1.02 × 107 | 2.20 × 105 | 8.60 × 106 | 8.40 × 104 |
| 5.10 × 106 | 2.20 × 106 | 2.45 × 106 | 4.50 × 105 | 1.25 × 107 | 1.30 × 105 | 1.06 × 107 | 5.00 × 104 |
| 4.60 × 106 | 2.60 × 106 | 2.20 × 106 | 4.90 × 105 | 1.12 × 107 | 1.60 × 105 | 9.60 × 106 | 6.10 × 104 |
| PCV-Ec2 | 4.20 × 106 | 3.90 × 106 | 2.00 × 106 | 7.10 × 105 | 1.06 × 107 | 2.50 × 105 | 9.00 × 106 | 9.80 × 104 |
| 5.20 × 106 | 2.40 × 106 | 2.50 × 106 | 5.30 × 105 | 1.30 × 107 | 1.50 × 105 | 1.10 × 107 | 6.00 × 104 |
| 4.70 × 106 | 2.70 × 106 | 2.25 × 106 | 7.10 × 105 | 1.18 × 107 | 1.70 × 105 | 1.00 × 107 | 6.70 × 104 |
| Kp | 4.60 × 106 | 5.70 × 106 | 2.20 × 106 | 1.17 × 106 | 1.15 × 107 | 3.50 × 105 | 9.20 × 106 | 1.30 × 105 |
| 5.60 × 106 | 3.50 × 106 | 2.80 × 106 | 7.50 × 105 | 1.40 × 107 | 2.10 × 105 | 1.12 × 107 | 8.50 × 104 |
| 5.10 × 106 | 4.00 × 106 | 2.50 × 106 | 7.80 × 105 | 1.26 × 107 | 2.50 × 105 | 1.02 × 107 | 8.50 × 104 |
| PCV-Kp | 4.50 × 106 | 4.90 × 106 | 2.09 × 106 | 1.01 × 106 | 1.10 × 107 | 3.00 × 105 | 9.70 × 106 | 1.13 × 105 |
| 5.50 × 106 | 3.00 × 106 | 2.59 × 106 | 6.50 × 105 | 1.35 × 107 | 1.80 × 105 | 1.19 × 107 | 7.00 × 104 |
| 5.03 × 106 | 3.50 × 106 | 2.38 × 106 | 6.80 × 105 | 1.21 × 107 | 2.10 × 105 | 1.08 × 107 | 7.80 × 104 |

**Supplementary Table S6: Total number of differentially expressed genes (DEGs) and number of genes annotated based on the Cluster of Orthologous Groups (COG) database and the Kyoto Encyclopedia of Genes and Genomes (KEGG) in wild-type Escherichia coli (Ec1, Ec2), Klebsiella pneumoniae (Kp) and their respective plasmid-cured variants (PCV-Ec2 and PCV-Kp) after incubation in river water (RW) and tap water (TW) between inoculation and day 14 (t0-t14).** In addition, the annotated DEGs were classified according to the direction of expression (↑...upregulation, ↓...downregulation). Only DEGs, which were significantly differentially expressed were included (p < 0.05, l2fc > |2|).

| Strain | total genes | DEGs total | DEGs COG annotation | DEGs KEGG annotation | COG t0-t14 ↑ | COG t0-t14 ↓ | KEGG t0-t14 ↑ | KEGG t0-t14 ↓ |
| --- | --- | --- | --- | --- | --- | --- | --- | --- |
| Ec1RW | 4629 | 528 | 498 | 367 | 225 | 273 | 165 | 202 |
| Ec1TW | 4629 | 416 | 377 | 246 | 127 | 250 | 92 | 154 |
| Ec2RW | 4547 | 76 | 67 | 51 | 26 | 41 | 22 | 29 |
| Ec2TW | 4547 | 288 | 249 | 181 | 120 | 129 | 112 | 69 |
| PCV-Ec2RW | 4391 | 115 | 110 | 84 | 61 | 49 | 48 | 36 |
| PCV-Ec2TW | 4391 | 168 | 152 | 109 | 72 | 80 | 62 | 47 |
| KpRW | 5381 | 1005 | 905 | 694 | 484 | 421 | 375 | 319 |
| KpTW | 5381 | 370 | 328 | 257 | 139 | 189 | 114 | 143 |
| PCV-KpRW | 5128 | 297 | 254 | 200 | 140 | 114 | 113 | 87 |
| PCV-KpTW | 5128 | 497 | 433 | 332 | 207 | 226 | 171 | 161 |

**Supplementary Table S7: Proportions of differentially expressed genes (DEGs) annotated according to the Cluster of Orthologous Groups (COG) database in wild-type Escherichia coli (Ec1, Ec2), Klebsiella pneumoniae (Kp), and the associated plasmid‑cured variants (PCV-Ec2, PCV-Kp) following exposure to river water (RW) and tap water (TW) between inoculation and day 14.** The annotated DEGs were grouped with respect to the orientation of expression (↑...upregulation, ↓...downregulation). Data exclusively comprised genes with significant differential expression (p < 0.05, l2fc > |2|).

| Condition | | Proportions of DEGs belonging to the respective COG categories [%] | | | | | | | | | | | | | |
| --- | --- | --- | --- | --- | --- | --- | --- | --- | --- | --- | --- | --- | --- | --- | --- |
| J | K | L | V | T | M | N | C | G | E | H | I | P | Q |
| Ec1 | RW↑ | 4.00 | 16.67 | 4.67 | 2.00 | 10.67 | 7.33 | 5.33 | 4.67 | 9.33 | 8.67 | 2.67 | 4.00 | 18.00 | 2.00 |
| RW↓ | 5.83 | 10.68 | 8.74 | 1.94 | 5.34 | 11.65 | 1.46 | 10.19 | 7.28 | 15.05 | 3.40 | 2.43 | 13.11 | 2.91 |
| TW↑ | 5.10 | 14.29 | 6.12 | 4.08 | 11.22 | 8.16 | 3.06 | 4.08 | 11.22 | 12.24 | 2.04 | 2.04 | 16.33 | 0.00 |
| TW↓ | 3.18 | 16.56 | 9.55 | 0.64 | 3.18 | 12.10 | 2.55 | 8.28 | 7.64 | 14.65 | 2.55 | 1.91 | 12.74 | 4.46 |
| Ec2 | RW↑ | 4.76 | 4.76 | 0.00 | 4.76 | 4.76 | 4.76 | 0.00 | 14.29 | 4.76 | 19.05 | 4.76 | 4.76 | 23.81 | 4.76 |
| RW↓ | 0.00 | 16.33 | 8.82 | 0.00 | 2.94 | 8.82 | 8.82 | 5.88 | 2.94 | 26.47 | 0.00 | 2.94 | 5.88 | 2.94 |
| TW↑ | 16.33 | 9.18 | 2.04 | 1.02 | 6.12 | 8.16 | 7.14 | 3.06 | 8.16 | 14.29 | 2.04 | 1.02 | 21.43 | 0.00 |
| TW↓ | 2.60 | 14.29 | 11.69 | 2.60 | 5.19 | 9.09 | 3.90 | 14.29 | 3.90 | 14.29 | 3.90 | 2.60 | 9.09 | 2.60 |
| PCV-Ec2 | RW↑ | 0.00 | 16.33 | 0.00 | 2.04 | 14.29 | 8.16 | 2.04 | 2.04 | 8.16 | 20.41 | 4.08 | 2.04 | 18.37 | 2.04 |
| RW↓ | 0.00 | 21.62 | 5.41 | 0.00 | 2.70 | 8.11 | 2.70 | 8.11 | 5.41 | 24.32 | 2.70 | 5.41 | 8.11 | 5.41 |
| TW↑ | 11.48 | 8.20 | 0.00 | 3.28 | 9.84 | 8.20 | 3.28 | 3.28 | 8.20 | 11.48 | 1.64 | 0.00 | 27.87 | 3.28 |
| TW↓ | 0.00 | 14.52 | 3.23 | 1.61 | 6.45 | 19.35 | 3.23 | 8.06 | 8.06 | 14.52 | 3.23 | 4.84 | 8.06 | 4.84 |
| Kp | RW↑ | 5.60 | 16.25 | 3.64 | 0.84 | 6.72 | 7.28 | 1.12 | 9.24 | 14.57 | 10.08 | 7.28 | 4.76 | 8.40 | 4.20 |
| RW↓ | 4.92 | 7.69 | 11.08 | 2.46 | 2.15 | 9.23 | 3.38 | 10.15 | 7.08 | 9.23 | 9.54 | 1.85 | 16.31 | 4.92 |
| TW↑ | 7.00 | 6.00 | 1.00 | 5.00 | 8.00 | 9.00 | 2.00 | 8.00 | 8.00 | 11.00 | 5.00 | 3.00 | 21.00 | 6.00 |
| TW↓ | 1.85 | 10.49 | 1.85 | 1.85 | 1.85 | 5.56 | 3.70 | 12.35 | 11.11 | 14.20 | 9.26 | 1.85 | 19.14 | 4.94 |
| PCV-Kp | RW↑ | 1.65 | 16.53 | 0.83 | 1.65 | 8.26 | 9.92 | 0.83 | 5.79 | 20.66 | 10.74 | 4.13 | 7.44 | 7.44 | 4.13 |
| RW↓ | 3.33 | 4.44 | 6.67 | 3.33 | 1.11 | 6.67 | 4.44 | 12.22 | 5.56 | 10.00 | 7.78 | 6.67 | 23.33 | 4.44 |
| TW↑ | 1.91 | 11.46 | 1.91 | 3.18 | 6.37 | 10.19 | 1.91 | 4.46 | 12.74 | 10.19 | 7.01 | 5.73 | 19.11 | 3.82 |
| TW↓ | 3.28 | 12.57 | 4.92 | 2.19 | 2.19 | 8.20 | 2.19 | 11.48 | 11.48 | 13.11 | 5.46 | 2.73 | 15.85 | 4.37 |

**Supplementary Table S8: Proportion of differentially expressed genes (DEGs) after a 14-day incubation in river water (RW) or tap water (TW) relative to the total combined gene count of the respective COG categories of the different bacterial species.** The relative differences were calculated by dividing the proportion of DEGs in Klebsiella pneumoniae (Kp) by that in Escherichia coli (Ec).

| COG category | upregulated genes in RW [%] | | downregulated genes in RW [%] | | upregulated genes in TW [%] | | downregulated genes in TW [%] | | Relative difference between Ec and Kp | | | | |
| --- | --- | --- | --- | --- | --- | --- | --- | --- | --- | --- | --- | --- | --- |
| up-regulation in RW | down-regulation in RW | up-regulation in TW | down-regulation in TW | Mean |
| Ec | Kp | Ec | Kp | Ec | Kp | Ec | Kp |
| Q | 2.27 | 4.18 | 3.25 | 4.82 | 0.78 | 4.67 | 4.05 | 4.64 | 1.84 | 1.48 | 6.00 | 1.14 | 2.62 |
| P | 18.64 | 8.16 | 11.55 | 17.83 | 21.01 | 19.84 | 10.81 | 17.39 | 0.44 | 1.54 | 0.94 | 1.61 | 1.13 |
| I | 3.64 | 5.44 | 2.89 | 2.89 | 1.17 | 4.67 | 2.70 | 2.32 | 1.50 | 1.00 | 4.00 | 0.86 | 1.84 |
| H | 3.18 | 6.49 | 2.89 | 9.16 | 1.95 | 6.23 | 3.04 | 7.25 | 2.04 | 3.17 | 3.20 | 2.38 | 2.70 |
| E | 12.27 | 10.25 | 17.69 | 9.40 | 12.84 | 10.51 | 14.53 | 13.62 | 0.84 | 0.53 | 0.82 | 0.94 | 0.78 |
| G | 8.64 | 16.11 | 6.50 | 6.75 | 9.34 | 10.89 | 6.76 | 11.30 | 1.87 | 1.04 | 1.17 | 1.67 | 1.44 |
| C | 5.00 | 8.37 | 9.39 | 10.60 | 3.50 | 5.84 | 9.80 | 11.88 | 1.67 | 1.13 | 1.67 | 1.21 | 1.42 |
| N | 4.09 | 1.05 | 2.53 | 3.61 | 4.67 | 1.95 | 3.04 | 2.90 | 0.26 | 1.43 | 0.42 | 0.95 | 0.76 |
| M | 7.27 | 7.95 | 10.83 | 8.67 | 8.17 | 9.73 | 12.84 | 6.96 | 1.09 | 0.80 | 1.19 | 0.54 | 0.91 |
| T | 10.91 | 7.11 | 4.69 | 1.93 | 8.95 | 7.00 | 4.39 | 2.03 | 0.65 | 0.41 | 0.78 | 0.46 | 0.58 |
| V | 2.27 | 1.05 | 1.44 | 2.65 | 2.72 | 3.89 | 1.35 | 2.03 | 0.46 | 1.84 | 1.43 | 1.50 | 1.31 |
| L | 3.18 | 2.93 | 8.30 | 10.12 | 3.11 | 1.56 | 8.78 | 3.48 | 0.92 | 1.22 | 0.50 | 0.40 | 0.76 |
| K | 15.45 | 16.32 | 13.72 | 6.99 | 10.89 | 9.34 | 15.54 | 11.59 | 1.06 | 0.51 | 0.86 | 0.75 | 0.79 |
| J | 3.18 | 4.60 | 4.33 | 4.58 | 10.89 | 3.89 | 2.36 | 2.61 | 1.45 | 1.06 | 0.36 | 1.10 | 0.99 |
