# Supplementary material
Source: Research Square preprint supplement (doi:10.21203/rs.3.rs-9425840/v1)
Supplement: Supplementary file 3 [file 5d14c59ba18989155313d54b.xlsx]

## Sheet: Tabelle1
Supplementary Data 1: Data underlying the differential gene expression analysis of wild-type strains and plasmid-cured variants (PCVs) of Escherichia coli (Ec1, Ec2, PCV-Ec2) and Klebsiella pneumoniae (Kp, PCV-Kp) following incubation in river water (RW) and tap water (TW) between inoculation and day 14 (t0-t14). DEGs are assigned to functional categories according to the Clusters of Orthologous …
COG category		Ec1				Ec2				PCV-Ec2				Kp				PCV-Kp
Full name	Abbreviation	t0-t14 RW↑	t0-t14 TW↑	t0-t14 RW↓	t0-t14 TW↓	t0-t14 RW↑	t0-t14 TW↑	t0-t14 RW↓	t0-t14 TW↓	t0-t14 RW↑	t0-t14 TW↑	t0-t14 RW↓	t0-t14 TW↓	t0-t14 RW↑	t0-t14 TW↑	t0-t14 RW↓	t0-t14 TW↓	t0-t14 RW↑	t0-t14 TW↑	t0-t14 RW↓	t0-t14 TW↓
Function unknown	S	68	29	57	83	3	16	10	47	11	12	11	23	120	37	84	35	27	47	31	47
General function prediction only	R	0	0	0	0	0	0	0	0	0	0	0	0	0	0	0	0	0	0	0	0
Secondary metabolites biosynthesis, transport and metabolism	Q	3	0	6	7	1	0	1	2	1	2	2	3	15	6	16	8	5	6	4	8
Inorganic ion transport and metabolism	P	27	16	27	20	5	21	2	7	9	17	3	5	30	21	53	31	9	30	21	29
Lipid transport and metabolism	I	6	2	5	3	1	1	1	2	1	0	2	3	17	3	6	3	9	9	6	5
Coenzyme transport and metabolism	H	4	2	7	4	1	2	0	3	2	1	1	2	22	5	31	15	5	11	7	10
Nucleotide transport and metabolism	F	9	2	12	5	3	12	0	1	5	4	2	0	10	3	12	4	2	4	2	4
Amino acid transport and metabolism	E	13	12	31	23	4	14	9	11	10	7	9	9	36	11	30	23	13	16	9	24
Carbohydrate transport and metabolism	G	14	11	15	12	1	8	1	3	4	5	2	5	52	8	23	18	25	20	5	21
Energy production and conversion	C	7	4	21	13	3	3	2	11	1	2	3	5	33	8	33	20	7	7	11	21
Posttranslational modification, protein turnover, chaperones	O	3	1	13	12	0	0	0	6	0	0	2	1	23	2	12	4	2	6	2	7
Intracellular traficking, secretion, and vesicular transport	U	6	5	6	5	0	2	3	3	3	1	2	3	14	10	18	6	2	6	5	8
Extracellular structures	W	0	0	0	0	0	0	0	0	0	0	0	0	0	0	0	0	0	0	0	0
Cytoskeleton	Z	0	0	0	0	0	0	0	0	0	0	0	0	0	0	0	0	0	0	0	0
Cell motility	N	8	3	3	4	0	7	3	3	1	2	1	2	4	2	11	6	1	3	4	4
Cell wall/membrane/envelope biogenesis	M	11	8	24	19	1	8	3	8	4	5	3	12	26	9	30	9	12	16	6	15
Signal transduction mechanisms	T	16	11	11	5	1	6	1	4	7	6	1	4	24	8	7	3	10	10	1	4
Defense mechanisms	V	3	4	4	1	1	1	0	2	1	2	0	1	3	5	8	3	2	5	3	4
Nuclear structure	Y	0	0	0	0	0	0	0	0	0	0	0	0	0	0	0	0	0	0	0	0
Cell cycle control, cell division, chromosome partitioning	D	3	2	2	1	0	1	0	3	0	0	1	1	5	1	6	1	1	1	0	2
Chromatin structure and dynamics	B	0	0	0	0	0	0	0	0	0	0	0	0	0	0	1	0	0	0	0	1
Replication, recombination and repair	L	7	6	18	15	0	2	3	9	0	0	2	2	13	1	36	3	1	3	6	9
Transcription	K	25	14	22	26	1	9	8	11	8	5	8	9	58	6	25	17	20	18	4	23
RNA processing and modification	A	1	0	0	0	0	0	0	0	0	0	0	0	0	0	0	0	0	0	0	0
Translation, Ribosomal structure	J	6	5	12	5	1	16	0	2	0	7	0	0	20	7	16	3	2	3	3	6
